# Supplementary material for: Underlying dyslipidemia postpartum in women with a recent GDM pregnancy who develop type 2 diabetes
Source: eLife. 2020 Aug 4;9:e59153. doi: 10.7554/eLife.59153 (PMC7417169; doi:10.7554/eLife.59153)
Supplement: Figure 2—source data 1. [file elife-59153-fig2-data1.xlsx]

## Sheet: species_OR
	Lipids	Odds ratio	95% CI-Lower	95% CI-Upper	FDR
1	FPG	1.09539	1.06523	1.1264	6.55001e-08
2	2hPG	1.02897	1.02002	1.038	6.55001e-08
3	fasting-insulin	1.03619	1.01842	1.05426	0.000615286
4	HOMA-IR	1.17965	1.10068	1.26429	0.000243057
5	HOMA-b	1.00041	0.998948	1.00188	0.664793
6	CE.12.0.	1.05635	0.831862	1.34142	0.734289
7	CE.14.0.	1.24519	0.842057	1.84132	0.360645
8	CE.14.1.	1.39583	1.01778	1.9143	0.0744061
9	CE.15.0.	0.67092	0.449964	1.00038	0.0916196
10	CE.16.0.	0.472429	0.277639	0.803883	0.0153091
11	CE.16.1.	1.01191	0.670721	1.52666	0.965579
12	CE.17.0.	0.518773	0.336613	0.799509	0.00874679
13	CE.18.0.	0.514328	0.314897	0.840063	0.0200256
14	CE.18.1.	0.480642	0.278577	0.829274	0.0212049
15	CE.18.2.	0.454285	0.248531	0.830379	0.0251143
16	CE.18.3.	1.0328	0.675501	1.57908	0.915012
17	CE.18.4.	1.28011	0.98447	1.66454	0.114568
18	CE.20.0.	0.977146	0.749371	1.27415	0.906383
19	CE.20.1.	0.778204	0.560428	1.0806	0.208518
20	CE.20.2.	0.68588	0.414442	1.1351	0.219738
21	CE.20.3.	0.687601	0.411583	1.14872	0.231138
22	CE.20.4.	0.506994	0.329921	0.779106	0.00611568
23	CE.20.5.	0.875943	0.661341	1.16018	0.456181
24	CE.22.0.	0.697481	0.491537	0.989711	0.0821048
25	CE.22.1.	0.848036	0.640505	1.12281	0.339063
26	CE.22.2.	1.05999	0.871734	1.28891	0.645736
27	CE.22.4.	0.696696	0.443722	1.09389	0.184837
28	CE.22.5.	0.603786	0.369036	0.987866	0.0833778
29	CE.22.6.	0.572452	0.397115	0.825205	0.00839969
30	CE.24.0.	0.844621	0.591477	1.20611	0.454107
31	CE.24.1.	0.970267	0.636073	1.48005	0.916381
32	CER.14.0.	0.626415	0.401397	0.977574	0.0759581
33	CER.16.0.	0.486049	0.289252	0.81674	0.0168417
34	CER.18.0.	0.639011	0.42033	0.971464	0.070297
35	CER.20.0.	0.605667	0.379421	0.966823	0.0697738
36	CER.22.0.	0.706828	0.430833	1.15963	0.251268
37	CER.22.1.	0.506897	0.319013	0.805437	0.0113737
38	CER.24.0.	0.708896	0.443627	1.13279	0.228872
39	CER.24.1.	0.467388	0.292946	0.745707	0.00485002
40	CER.26.0.	0.834079	0.573359	1.21336	0.441782
41	CER.26.1.	0.512308	0.339434	0.773228	0.0048795
42	DAG.12.0.16.0.	1.10694	0.795226	1.54084	0.637131
43	DAG.12.0.18.1.	1.31971	1.00003	1.74158	0.091378
44	DAG.12.0.18.2.	1.33926	1.03368	1.73517	0.0552611
45	DAG.14.0.14.0.	1.11959	0.950499	1.31876	0.258468
46	DAG.14.0.16.0.	1.34705	1.09227	1.66126	0.0145038
47	DAG.14.0.16.1.	1.37162	1.06887	1.76014	0.0302705
48	DAG.14.0.18.1.	1.71567	1.24815	2.3583	0.0033696
49	DAG.14.0.18.2.	1.76795	1.31401	2.37872	0.001175
50	DAG.14.0.18.3.	1.52072	1.13802	2.03213	0.0127483
51	DAG.14.0.20.0.	0.874901	0.658551	1.16233	0.456582
52	DAG.14.0.20.4.	1.4387	1.1222	1.84445	0.0115207
53	DAG.14.1.16.0.	0.951982	0.85997	1.05384	0.441782
54	DAG.14.1.18.1.	0.931261	0.797264	1.08778	0.469608
55	DAG.15.0.18.1.	1.34757	0.887609	2.04588	0.242727
56	DAG.15.0.18.2.	1.18388	0.800388	1.75112	0.499665
57	DAG.16.0.16.0.	1.77062	1.35078	2.32096	0.000450519
58	DAG.16.0.16.1.	1.55559	1.21824	1.98636	0.00182782
59	DAG.16.0.18.0.	1.88678	1.26568	2.81267	0.00584505
60	DAG.16.0.18.1.	1.71043	1.23767	2.36378	0.00409479
61	DAG.16.0.18.2.	1.77386	1.25891	2.49944	0.00382627
62	DAG.16.0.18.3.	1.79257	1.29942	2.47289	0.00179453
63	DAG.16.0.20.3.	1.99829	1.38563	2.88184	0.00129974
64	DAG.16.0.20.4.	1.67894	1.22625	2.29874	0.00429121
65	DAG.16.0.22.5.	1.7243	1.18945	2.49965	0.0113737
66	DAG.16.0.22.6.	1.2739	0.944947	1.71736	0.180963
67	DAG.16.1.16.1.	1.17994	0.902822	1.54212	0.314088
68	DAG.16.1.18.0.	1.24065	0.900261	1.70973	0.271104
69	DAG.16.1.18.1.	0.995781	0.812323	1.22067	0.975861
70	DAG.16.1.18.2.	1.37808	0.98066	1.93656	0.113711
71	DAG.16.1.18.3.	1.0456	0.822088	1.32988	0.788322
72	DAG.16.1.20.2.	1.14509	0.81639	1.60615	0.531829
73	DAG.16.1.20.4.	1.32195	0.986316	1.7718	0.11001
74	DAG.16.1.22.6.	1.00242	0.818519	1.22763	0.985976
75	DAG.18.0.18.1.	1.55831	1.10806	2.1915	0.0258009
76	DAG.18.0.18.2.	1.58907	1.1077	2.27963	0.0281223
77	DAG.18.0.18.3.	1.51654	1.05717	2.1755	0.0500181
78	DAG.18.0.22.6.	0.95892	0.845509	1.08754	0.607755
79	DAG.18.1.18.1.	1.16405	0.794451	1.70561	0.533165
80	DAG.18.1.18.2.	1.10561	0.757566	1.61356	0.687245
81	DAG.18.1.20.1.	1.13328	0.721433	1.78024	0.67231
82	DAG.18.1.20.2.	1.05993	0.634727	1.76998	0.874337
83	DAG.18.1.20.3.	1.16613	0.76798	1.7707	0.569247
84	DAG.18.1.20.4.	1.14004	0.756462	1.7181	0.62299
85	DAG.18.1.20.5.	1.23544	0.901428	1.69322	0.2712
86	DAG.18.1.22.4.	0.914137	0.570986	1.46352	0.781817
87	DAG.18.1.22.5.	1.04391	0.715598	1.52284	0.874337
88	DAG.18.1.22.6.	1.03509	0.801003	1.33759	0.852247
89	DAG.18.2.18.3.	1.19117	0.863899	1.64243	0.376652
90	DAG.18.2.20.3.	1.04825	0.686733	1.60009	0.876218
91	DAG.18.2.20.4.	1.13605	0.793238	1.62702	0.585537
92	DAG.18.2.20.5.	1.06888	0.796983	1.43355	0.73528
93	DAG.18.2.22.4.	1.20751	0.767929	1.89873	0.515237
94	DAG.18.2.22.5.	0.978316	0.685625	1.39596	0.924059
95	DAG.18.2.22.6.	1.01242	0.801577	1.27873	0.935691
96	DCER.16.0.	0.622222	0.423007	0.915256	0.0360103
97	DCER.18.0.	0.90716	0.800708	1.02777	0.197092
98	DCER.20.0.	0.782698	0.568136	1.07829	0.208518
99	DCER.22.0.	0.976285	0.6061	1.57256	0.93854
100	DCER.22.1.	0.803076	0.526989	1.22381	0.401463
101	DCER.22.2.	0.948386	0.613851	1.46524	0.866147
102	DCER.24.0.	0.762857	0.476513	1.22127	0.347645
103	DCER.24.1.	0.600238	0.392023	0.919043	0.0419247
104	DCER.26.0.	0.957794	0.721637	1.27123	0.832195
105	FFA.12.0.	0.694337	0.483164	0.997807	0.089516
106	FFA.14.0.	0.653432	0.449053	0.950831	0.0542938
107	FFA.14.1.	0.762283	0.599497	0.969271	0.0550913
108	FFA.15.0.	0.709748	0.536327	0.939245	0.036933
109	FFA.16.0.	0.728544	0.510819	1.03907	0.137229
110	FFA.16.1.	0.6582	0.484889	0.893458	0.0186312
111	FFA.17.0.	0.643466	0.435868	0.949939	0.0548339
112	FFA.18.0.	0.704065	0.487624	1.01658	0.10918
113	FFA.18.1.	0.638034	0.437966	0.929497	0.0425805
114	FFA.18.2.	0.644381	0.440152	0.943372	0.0501847
115	FFA.18.4.	0.754114	0.529786	1.07343	0.185408
116	FFA.20.0.	0.669987	0.472814	0.949384	0.0510651
117	FFA.20.1.	0.697045	0.497397	0.976828	0.070297
118	FFA.20.2.	0.658822	0.464371	0.934698	0.0427437
119	FFA.20.3.	0.808027	0.569561	1.14633	0.320996
120	FFA.20.4.	0.728197	0.503199	1.0538	0.154761
121	FFA.20.5.	0.724493	0.520806	1.00784	0.100015
122	FFA.22.0.	0.709076	0.506704	0.992272	0.0838544
123	FFA.22.1.	0.819577	0.613804	1.09433	0.259217
124	FFA.22.2.	0.751598	0.545187	1.03616	0.138211
125	FFA.22.4.	0.7044	0.486713	1.01945	0.111573
126	FFA.22.5.	0.812341	0.588779	1.12079	0.290622
127	FFA.22.6.	0.789528	0.56606	1.10122	0.24415
128	FFA.24.0.	0.818598	0.580774	1.15381	0.341133
129	FFA.24.1.	0.816749	0.614104	1.08626	0.24415
130	HCER.14.0.	0.611694	0.428544	0.87312	0.0175128
131	HCER.16.0.	0.476933	0.312048	0.728942	0.00253872
132	HCER.18.0.	0.45747	0.303429	0.689714	0.00124814
133	HCER.18.1.	0.571068	0.402262	0.810712	0.00555751
134	HCER.20.0.	0.593558	0.400646	0.879356	0.0229194
135	HCER.22.0.	0.671983	0.458657	0.984528	0.0790549
136	HCER.22.1.	0.655706	0.454926	0.945098	0.0500181
137	HCER.24.0.	0.645267	0.43811	0.950377	0.0548339
138	HCER.24.1.	0.490049	0.340061	0.706191	0.000972102
139	LCER.14.0.	0.594773	0.432165	0.818564	0.00485002
140	LCER.16.0.	0.472445	0.325282	0.686186	0.000757697
141	LCER.18.0.	0.513376	0.31766	0.829674	0.0168938
142	LCER.18.1.	0.72967	0.49363	1.07858	0.183107
143	LCER.20.0.	0.52005	0.353484	0.765105	0.00342841
144	LCER.20.1.	0.678026	0.486129	0.945675	0.0478279
145	LCER.22.0.	0.579221	0.410457	0.817373	0.00597965
146	LCER.22.1.	0.568562	0.400103	0.807949	0.00530805
147	LCER.24.0.	0.612796	0.434205	0.864841	0.0145037
148	LCER.24.1.	0.547788	0.39346	0.762648	0.00179453
149	LPC.14.0.	1.11354	0.776821	1.5962	0.645736
150	LPC.15.0.	0.660338	0.459574	0.948807	0.0517277
151	LPC.16.0.	0.656527	0.426751	1.01002	0.100015
152	LPC.16.1.	0.722568	0.490769	1.06385	0.164342
153	LPC.17.0.	0.539207	0.376892	0.771423	0.00283167
154	LPC.18.0.	0.723644	0.486036	1.07741	0.17972
155	LPC.18.1.	0.609266	0.418755	0.88645	0.0235933
156	LPC.18.2.	0.671693	0.472028	0.955814	0.0552611
157	LPC.18.3.	0.978029	0.748221	1.27842	0.908455
158	LPC.20.2.	0.843806	0.630167	1.12987	0.342132
159	LPC.20.3.	0.893944	0.619153	1.29069	0.638297
160	LPC.20.4.	0.605372	0.426232	0.859804	0.0138694
161	LPE.16.0.	0.781307	0.520651	1.17246	0.32149
162	LPE.16.1.	1.23013	0.959397	1.57726	0.168548
163	LPE.18.0.	0.709593	0.466515	1.07933	0.177373
164	LPE.18.1.	0.970363	0.681524	1.38162	0.907255
165	LPE.18.2.	1.02636	0.783448	1.34459	0.893762
166	LPE.20.3.	1.02478	0.714242	1.47034	0.916685
167	LPE.20.4.	0.759979	0.517046	1.11705	0.243903
168	LPE.22.5.	0.958669	0.654088	1.40508	0.876733
169	LPE.22.6.	0.713582	0.50062	1.01714	0.11001
170	MAG.15.0.	0.897088	0.786464	1.02327	0.173377
171	MAG.16.0.	0.928271	0.7813	1.10289	0.499574
172	MAG.16.1.	0.850479	0.708394	1.02106	0.139619
173	MAG.18.0.	0.95077	0.783352	1.15397	0.693994
174	MAG.18.1.	1.1406	0.84259	1.54401	0.49679
175	MAG.18.2.	1.15706	0.818824	1.63502	0.508638
176	MAG.18.3.	0.72892	0.49852	1.0658	0.168877
177	PC.14.0.18.1.	0.930567	0.603568	1.43473	0.812914
178	PC.14.0.18.2.	0.822329	0.529145	1.27796	0.486411
179	PC.14.0.20.3.	1.01263	0.738281	1.38893	0.954209
180	PC.14.0.20.4.	0.748801	0.498818	1.12406	0.243903
181	PC.15.0.18.1.	0.501834	0.347343	0.72504	0.00137192
182	PC.15.0.18.2.	0.602167	0.407278	0.890314	0.026284
183	PC.16.0.14.0.	1.25656	0.882691	1.78879	0.290166
184	PC.16.0.16.0.	0.814719	0.611923	1.08472	0.241912
185	PC.16.0.16.1.	1.29612	0.892867	1.88149	0.254343
186	PC.16.0.18.0.	0.847397	0.64725	1.10944	0.317272
187	PC.16.0.18.1.	0.563832	0.319704	0.994379	0.0883258
188	PC.16.0.18.2.	0.495268	0.284077	0.863464	0.0305899
189	PC.16.0.18.3.	1.36581	0.926833	2.0127	0.184171
190	PC.16.0.20.1.	0.492898	0.321138	0.756522	0.00424658
191	PC.16.0.20.2.	0.743199	0.46857	1.17879	0.29241
192	PC.16.0.20.3.	0.939296	0.58553	1.5068	0.853291
193	PC.16.0.20.4.	0.475093	0.29274	0.771036	0.00782257
194	PC.16.0.20.5.	0.98334	0.743262	1.30096	0.925516
195	PC.16.0.22.4.	1.06398	0.680418	1.66376	0.846544
196	PC.16.0.22.5.	0.598241	0.353547	1.01229	0.100015
197	PC.16.0.22.6.	0.623203	0.427009	0.909539	0.0324425
198	PC.17.0.18.1.	0.418132	0.273323	0.639662	0.000620938
199	PC.17.0.18.2.	0.408107	0.268532	0.62023	0.000390102
200	PC.17.0.20.4.	0.539876	0.383891	0.759242	0.00182782
201	PC.18.0.16.1.	1.19445	0.877587	1.62573	0.346893
202	PC.18.0.18.0.	0.873163	0.621598	1.22654	0.531883
203	PC.18.0.18.1.	0.813147	0.511812	1.2919	0.482967
204	PC.18.0.18.2.	0.698247	0.431697	1.12938	0.220548
205	PC.18.0.18.3.	1.44241	1.0502	1.9811	0.0500181
206	PC.18.0.20.2.	1.08802	0.752256	1.57366	0.734653
207	PC.18.0.20.3.	1.19169	0.796069	1.78392	0.49679
208	PC.18.0.20.4.	0.597357	0.394222	0.905161	0.03435
209	PC.18.0.20.5.	1.01821	0.78021	1.32881	0.916685
210	PC.18.0.22.4.	1.46952	1.00424	2.15038	0.0880441
211	PC.18.0.22.5.	1.07414	0.708557	1.62834	0.805864
212	PC.18.0.22.6.	0.714582	0.491197	1.03956	0.135124
213	PC.18.1.16.1.	0.403529	0.248724	0.654683	0.0013714
214	PC.18.1.18.1.	0.49923	0.327927	0.760018	0.00423449
215	PC.18.1.18.2.	0.503782	0.329401	0.770478	0.00515205
216	PC.18.1.18.3.	0.962078	0.712786	1.29856	0.85802
217	PC.18.1.20.2.	0.661494	0.4655	0.94001	0.0460876
218	PC.18.1.20.3.	0.694248	0.458848	1.05041	0.142132
219	PC.18.1.20.4.	0.408851	0.269609	0.620004	0.000390012
220	PC.18.1.20.5.	0.837633	0.664277	1.05623	0.208518
221	PC.18.1.22.5.	0.612918	0.430177	0.873288	0.0174784
222	PC.18.1.22.6.	0.513626	0.360194	0.732415	0.0013714
223	PC.18.2.16.1.	0.390647	0.247467	0.616668	0.000604731
224	PC.18.2.18.2.	0.714263	0.484509	1.05297	0.149859
225	PC.18.2.18.3.	0.806765	0.577	1.12802	0.294207
226	PC.18.2.20.2.	0.630977	0.455843	0.873396	0.0148617
227	PC.18.2.20.3.	0.915461	0.603555	1.38855	0.756001
228	PC.18.2.20.4.	0.488576	0.302636	0.788757	0.00987146
229	PC.20.0.18.1.	0.729103	0.538045	0.988006	0.0791868
230	PC.20.0.18.2.	0.682137	0.490167	0.949292	0.0496732
231	PC.20.0.20.4.	0.628669	0.460191	0.858828	0.0102823
232	PE.16.0.18.1.	1.52861	1.01446	2.30334	0.0807691
233	PE.16.0.18.2.	1.53526	1.03055	2.28714	0.068979
234	PE.16.0.20.3.	1.2292	0.903089	1.67306	0.272058
235	PE.16.0.20.4.	1.03668	0.663481	1.61981	0.909743
236	PE.16.0.22.5.	1.26626	0.860621	1.86309	0.319628
237	PE.16.0.22.6.	0.828132	0.595028	1.15256	0.352348
238	PE.18.0.18.0.	0.6785	0.461509	0.997515	0.089516
239	PE.18.0.18.1.	1.12835	0.621207	2.04952	0.765341
240	PE.18.0.18.2.	1.42198	0.815573	2.47928	0.301072
241	PE.18.0.20.2.	0.947362	0.619327	1.44915	0.859637
242	PE.18.0.20.3.	1.25795	0.787233	2.01012	0.437423
243	PE.18.0.20.4.	0.76929	0.468004	1.26453	0.393453
244	PE.18.0.20.5.	1.04753	0.794946	1.38037	0.810623
245	PE.18.0.22.4.	1.60687	1.06665	2.42067	0.0496732
246	PE.18.0.22.5.	1.31503	0.788379	2.19351	0.385194
247	PE.18.0.22.6.	0.856256	0.587016	1.24899	0.520621
248	PE.18.1.18.1.	1.20783	0.827364	1.76327	0.426723
249	PE.18.1.18.2.	1.08718	0.730161	1.61877	0.756199
250	PE.18.1.20.3.	1.027	0.742844	1.41984	0.908455
251	PE.18.1.20.4.	0.779953	0.523311	1.16246	0.309771
252	PE.18.1.22.6.	0.746718	0.55688	1.00127	0.0926369
253	PE.18.2.16.1.	0.793095	0.59533	1.05656	0.18221
254	PE.O.16.0.18.2.	0.859171	0.638026	1.15697	0.413705
255	PE.O.16.0.20.4.	0.889679	0.659311	1.20054	0.542298
256	PE.O.16.0.22.5.	0.802088	0.564591	1.13949	0.305846
257	PE.O.16.0.22.6.	0.722238	0.526974	0.989857	0.081412
258	PE.O.18.0.18.1.	0.900859	0.63467	1.27869	0.645736
259	PE.O.18.0.18.2.	0.75732	0.508249	1.12845	0.253852
260	PE.O.18.0.20.4.	0.754121	0.530743	1.07151	0.184232
261	PE.O.18.0.22.5.	0.831492	0.600752	1.15086	0.35429
262	PE.P.16.0.18.1.	0.804886	0.561186	1.15441	0.326424
263	PE.P.16.0.18.2.	0.924722	0.671373	1.27367	0.717519
264	PE.P.16.0.20.3.	1.02376	0.744793	1.40722	0.916381
265	PE.P.16.0.20.4.	0.837532	0.610683	1.14865	0.360416
266	PE.P.16.0.22.4.	0.80379	0.576084	1.1215	0.282256
267	PE.P.16.0.22.5.	0.829739	0.56438	1.21986	0.441782
268	PE.P.16.0.22.6.	0.706	0.505642	0.98575	0.0785121
269	PE.P.18.0.16.0.	0.665698	0.463489	0.956124	0.0562365
270	PE.P.18.0.18.1.	0.789228	0.555751	1.12079	0.269218
271	PE.P.18.0.18.2.	0.863103	0.629812	1.18281	0.460148
272	PE.P.18.0.20.3.	0.894629	0.647107	1.23683	0.596874
273	PE.P.18.0.20.4.	0.753213	0.551979	1.02781	0.128335
274	PE.P.18.0.20.5.	0.922593	0.733199	1.16091	0.589847
275	PE.P.18.0.22.4.	0.788955	0.589993	1.05501	0.177914
276	PE.P.18.0.22.5.	0.806434	0.563355	1.1544	0.327512
277	PE.P.18.0.22.6.	0.715319	0.524121	0.976267	0.0688978
278	PE.P.18.1.16.0.	0.850609	0.63156	1.14563	0.377414
279	PE.P.18.1.18.1.	0.708828	0.502828	0.999222	0.0908845
280	PE.P.18.1.18.2.	0.821632	0.586756	1.15053	0.341133
281	PE.P.18.1.20.3.	0.824181	0.596894	1.13801	0.327512
282	PE.P.18.1.20.4.	0.737721	0.535037	1.01719	0.111796
283	PE.P.18.1.22.5.	0.694272	0.470526	1.02441	0.115532
284	PE.P.18.1.22.6.	0.646153	0.467519	0.893041	0.0205653
285	PI.16.0.18.1.	1.30301	0.87835	1.93297	0.2712
286	PI.16.0.18.2.	1.47616	0.982461	2.21794	0.108792
287	PI.16.0.20.3.	1.3018	0.928989	1.82422	0.196634
288	PI.16.0.20.4.	1.31361	0.874718	1.97273	0.2712
289	PI.18.0.16.1.	1.0213	0.758607	1.37495	0.916381
290	PI.18.0.18.1.	0.868215	0.580114	1.2994	0.589847
291	PI.18.0.18.2.	0.763673	0.487483	1.19634	0.327176
292	PI.18.0.20.3.	0.823166	0.526304	1.28747	0.49679
293	PI.18.0.20.4.	0.540171	0.322258	0.905437	0.0427989
294	PI.18.0.22.5.	0.975846	0.688954	1.38221	0.916381
295	PI.18.1.18.1.	0.803526	0.585417	1.1029	0.258191
296	PI.18.1.18.2.	0.797968	0.5683	1.12045	0.274854
297	PI.18.1.20.4.	0.702429	0.484783	1.01779	0.11001
298	SM.14.0.	0.473036	0.297071	0.753228	0.00526911
299	SM.16.0.	0.427267	0.264787	0.689448	0.00210502
300	SM.18.0.	0.419742	0.266761	0.660456	0.0011981
301	SM.18.1.	0.368336	0.235747	0.575495	0.00031909
302	SM.20.0.	0.82554	0.589551	1.15599	0.352943
303	SM.20.1.	0.366853	0.230341	0.584271	0.000389674
304	SM.22.0.	0.678385	0.431036	1.06768	0.156088
305	SM.22.1.	0.502487	0.316146	0.79866	0.0103812
306	SM.24.0.	0.513627	0.329783	0.799959	0.00946693
307	SM.24.1.	0.3935	0.246398	0.628422	0.000796972
308	SM.26.0.	0.538748	0.338042	0.858619	0.0229194
309	SM.26.1.	0.468189	0.301129	0.727929	0.00290867
310	TAG36.0.FA12.0	1.09707	0.929666	1.29461	0.361238
311	TAG38.0.FA12.0	1.05272	0.905153	1.22435	0.600032
312	TAG40.0.FA14.0	1.24138	1.07036	1.43973	0.011864
313	TAG40.0.FA16.0	1.25253	1.10801	1.4159	0.00165575
314	TAG42.0.FA12.0	1.25279	1.11607	1.40627	0.000977299
315	TAG42.0.FA14.0	1.29738	1.13773	1.47944	0.000820693
316	TAG42.0.FA16.0	1.29833	1.14003	1.47862	0.000757697
317	TAG42.1.FA14.0	1.32197	1.15082	1.51858	0.000751423
318	TAG42.1.FA16.0	1.34929	1.17563	1.5486	0.000362093
319	TAG42.1.FA16.1	1.37035	1.14433	1.64102	0.00251512
320	TAG42.1.FA18.1	1.28375	1.10024	1.49786	0.00502158
321	TAG42.2.FA18.2	1.30232	1.0976	1.54521	0.00747581
322	TAG44.0.FA12.0	1.35602	1.16815	1.57411	0.000642835
323	TAG44.0.FA14.0	1.39114	1.21341	1.5949	0.000226457
324	TAG44.0.FA16.0	1.33664	1.17049	1.52637	0.000341613
325	TAG44.0.FA18.0	0.845364	0.622486	1.14804	0.372832
326	TAG44.1.FA12.0	1.28404	1.11806	1.47466	0.00183356
327	TAG44.1.FA14.0	1.35299	1.16519	1.57107	0.000708562
328	TAG44.1.FA14.1	1.40515	1.19771	1.64853	0.00040559
329	TAG44.1.FA16.0	1.36539	1.17765	1.58305	0.000464701
330	TAG44.1.FA16.1	1.3722	1.17108	1.60786	0.000791635
331	TAG44.1.FA18.1	1.36737	1.14366	1.63482	0.00247795
332	TAG44.2.FA12.0	1.27557	1.09731	1.48279	0.00508431
333	TAG44.2.FA14.0	1.32964	1.12126	1.57676	0.00382627
334	TAG44.2.FA16.0	1.45035	1.22422	1.71825	0.000335087
335	TAG44.2.FA16.1	1.33272	1.13092	1.57053	0.00250297
336	TAG44.2.FA18.1	1.4321	1.17444	1.74629	0.00181546
337	TAG44.2.FA18.2	1.34889	1.14695	1.58638	0.00155845
338	TAG44.3.FA18.2	1.50137	1.23005	1.83253	0.000653093
339	TAG45.0.FA16.0	1.52531	1.27456	1.82539	0.00027355
340	TAG45.1.FA16.0	1.47432	1.20207	1.80824	0.00124814
341	TAG45.1.FA18.1	1.28844	1.07207	1.54847	0.0177428
342	TAG46.0.FA12.0	1.31637	1.13138	1.53161	0.00179453
343	TAG46.0.FA14.0	1.46806	1.25706	1.71447	0.000195978
344	TAG46.0.FA16.0	1.44424	1.24374	1.67705	0.000195978
345	TAG46.0.FA18.0	1.35554	1.14655	1.60263	0.00179453
346	TAG46.1.FA12.0	1.352	1.14876	1.5912	0.00153348
347	TAG46.1.FA14.0	1.48173	1.24485	1.76367	0.000314823
348	TAG46.1.FA14.1	1.91219	1.34634	2.71585	0.0015429
349	TAG46.1.FA16.0	1.40491	1.1982	1.64728	0.000393611
350	TAG46.1.FA16.1	1.44261	1.22625	1.69715	0.000314823
351	TAG46.1.FA18.0	1.40561	1.16506	1.69583	0.00179453
352	TAG46.1.FA18.1	1.41945	1.17438	1.71566	0.0015429
353	TAG46.2.FA12.0	1.37038	1.1487	1.63484	0.00202306
354	TAG46.2.FA14.0	1.54376	1.26189	1.88859	0.000389674
355	TAG46.2.FA14.1	1.4435	1.20187	1.73372	0.000774687
356	TAG46.2.FA16.0	1.42758	1.19729	1.70215	0.000708562
357	TAG46.2.FA16.1	1.39445	1.1609	1.67498	0.00179453
358	TAG46.2.FA18.1	1.41538	1.15522	1.73415	0.0030749
359	TAG46.2.FA18.2	1.41765	1.18142	1.70113	0.0011981
360	TAG46.3.FA12.0	1.36041	1.12717	1.64191	0.00463893
361	TAG46.3.FA14.0	1.4852	1.20611	1.82886	0.00124814
362	TAG46.3.FA14.1	1.5103	1.19364	1.91097	0.00247482
363	TAG46.3.FA16.0	1.53292	1.23751	1.89884	0.000791635
364	TAG46.3.FA16.1	1.42853	1.1547	1.7673	0.0037409
365	TAG46.3.FA18.1	1.51156	1.18275	1.93178	0.00361125
366	TAG46.3.FA18.2	1.45987	1.17503	1.81376	0.00256591
367	TAG46.3.FA18.3	1.37327	1.15376	1.63453	0.00178993
368	TAG46.4.FA18.2	1.53979	1.21354	1.95376	0.00179663
369	TAG47.0.FA14.0	1.48199	1.24009	1.77107	0.00031909
370	TAG47.0.FA15.0	1.59709	1.30525	1.95418	0.00027355
371	TAG47.0.FA16.0	1.57778	1.30476	1.90793	0.00023262
372	TAG47.0.FA17.0	1.96042	1.3425	2.86275	0.00210502
373	TAG47.1.FA14.0	1.50237	1.22085	1.8488	0.000923809
374	TAG47.1.FA15.0	1.51541	1.22885	1.8688	0.000820693
375	TAG47.1.FA16.0	1.5529	1.27186	1.89604	0.00031909
376	TAG47.1.FA16.1	1.53011	1.21814	1.92197	0.00141097
377	TAG47.1.FA17.0	1.59845	1.19923	2.13056	0.00473505
378	TAG47.1.FA18.1	1.49926	1.19831	1.87579	0.00182782
379	TAG47.2.FA14.0	1.56246	1.22485	1.99313	0.00168874
380	TAG47.2.FA15.0	1.53551	1.21241	1.94472	0.00179453
381	TAG47.2.FA16.1	1.45923	1.15655	1.84112	0.00487056
382	TAG47.2.FA18.1	1.42762	1.10254	1.84854	0.0177664
383	TAG47.2.FA18.2	1.58243	1.24257	2.01524	0.00124814
384	TAG48.0.FA14.0	1.57693	1.29467	1.92073	0.00027355
385	TAG48.0.FA16.0	1.58016	1.31462	1.89935	0.000195978
386	TAG48.0.FA18.0	1.52067	1.26495	1.82808	0.000314823
387	TAG48.1.FA12.0	1.26711	1.05886	1.51632	0.0237758
388	TAG48.1.FA14.0	1.64929	1.32293	2.05615	0.000314823
389	TAG48.1.FA14.1	1.45836	1.19512	1.7796	0.00126437
390	TAG48.1.FA16.0	1.61206	1.31226	1.98035	0.00027355
391	TAG48.1.FA16.1	1.52092	1.25919	1.83705	0.00031909
392	TAG48.1.FA18.0	1.4416	1.18593	1.75237	0.00137192
393	TAG48.1.FA18.1	1.64736	1.31694	2.06069	0.00031909
394	TAG48.2.FA12.0	1.31726	1.07227	1.61823	0.0216524
395	TAG48.2.FA14.0	1.77384	1.37772	2.28386	0.000314823
396	TAG48.2.FA14.1	1.50855	1.20794	1.88395	0.00153348
397	TAG48.2.FA16.0	1.6957	1.34053	2.14498	0.00031909
398	TAG48.2.FA16.1	1.51563	1.21629	1.88865	0.00129974
399	TAG48.2.FA18.0	1.32489	1.08491	1.61796	0.0154938
400	TAG48.2.FA18.1	1.48396	1.17327	1.87693	0.00364782
401	TAG48.2.FA18.2	1.77609	1.38606	2.27587	0.00027355
402	TAG48.3.FA12.0	1.31093	1.05874	1.6232	0.0302705
403	TAG48.3.FA14.0	1.72218	1.31463	2.25606	0.000751423
404	TAG48.3.FA14.1	1.63626	1.25747	2.12916	0.00138016
405	TAG48.3.FA16.0	1.66042	1.31042	2.1039	0.000390102
406	TAG48.3.FA16.1	1.60426	1.22168	2.10664	0.00269403
407	TAG48.3.FA18.1	1.36285	1.07495	1.72786	0.0254245
408	TAG48.3.FA18.2	1.58785	1.22331	2.06103	0.00215405
409	TAG48.3.FA18.3	1.60626	1.30019	1.98437	0.00031909
410	TAG48.4.FA12.0	1.2818	1.04185	1.57701	0.0419247
411	TAG48.4.FA14.0	1.67914	1.29988	2.16904	0.000708562
412	TAG48.4.FA14.1	1.53467	1.14573	2.05565	0.0114603
413	TAG48.4.FA16.0	1.68127	1.3147	2.15004	0.000450519
414	TAG48.4.FA16.1	1.61058	1.213	2.13848	0.00364782
415	TAG48.4.FA18.1	1.45286	1.11764	1.88862	0.0143793
416	TAG48.4.FA18.2	1.34045	1.06093	1.69362	0.0321606
417	TAG48.4.FA18.3	1.48237	1.1833	1.85702	0.00252105
418	TAG48.4.FA20.4	1.35617	1.13168	1.6252	0.0036119
419	TAG48.5.FA18.2	1.36655	1.05508	1.76997	0.0400922
420	TAG48.5.FA18.3	1.36295	1.07223	1.73251	0.0270901
421	TAG49.0.FA15.0	1.63649	1.27296	2.10382	0.000923809
422	TAG49.0.FA16.0	1.60605	1.29478	1.99216	0.00032664
423	TAG49.0.FA17.0	1.62686	1.30184	2.03304	0.000341613
424	TAG49.0.FA18.0	1.55605	1.23295	1.96381	0.00124814
425	TAG49.1.FA14.0	1.54661	1.22613	1.95085	0.0013714
426	TAG49.1.FA15.0	1.66746	1.26527	2.19749	0.00153348
427	TAG49.1.FA16.0	1.65266	1.27833	2.13661	0.000950084
428	TAG49.1.FA16.1	1.57952	1.25148	1.99355	0.000923809
429	TAG49.1.FA17.0	1.56766	1.24323	1.97674	0.00104085
430	TAG49.1.FA18.1	1.63948	1.24256	2.16319	0.0020449
431	TAG49.2.FA14.0	1.59181	1.20959	2.09482	0.00342841
432	TAG49.2.FA15.0	1.78944	1.28533	2.49129	0.00237641
433	TAG49.2.FA16.0	1.76111	1.30481	2.37698	0.00130773
434	TAG49.2.FA16.1	1.46996	1.10959	1.94737	0.0185672
435	TAG49.2.FA17.0	1.62768	1.23837	2.13938	0.00205412
436	TAG49.2.FA18.1	1.34162	0.994613	1.8097	0.0983767
437	TAG49.2.FA18.2	1.73272	1.2741	2.35642	0.00200016
438	TAG49.3.FA15.0	1.57272	1.11916	2.21008	0.0225548
439	TAG49.3.FA16.0	1.95523	1.40856	2.71407	0.000638183
440	TAG49.3.FA16.1	1.44511	0.999451	2.08949	0.091643
441	TAG49.3.FA18.2	1.58984	1.11337	2.27022	0.0258006
442	TAG49.3.FA18.3	1.70226	1.28363	2.25743	0.00132437
443	TAG50.0.FA14.0	1.71878	1.28416	2.30049	0.00148341
444	TAG50.0.FA16.0	1.7521	1.37276	2.23627	0.000286874
445	TAG50.0.FA18.0	1.70413	1.35343	2.1457	0.00027355
446	TAG50.1.FA14.0	1.652	1.25494	2.17468	0.00175047
447	TAG50.1.FA16.0	1.8428	1.39675	2.4313	0.00031909
448	TAG50.1.FA16.1	1.64625	1.26672	2.1395	0.00124814
449	TAG50.1.FA18.0	1.70369	1.32024	2.19851	0.000501381
450	TAG50.1.FA18.1	1.83655	1.38035	2.44351	0.00040559
451	TAG50.1.FA20.1	1.63959	1.30535	2.05942	0.000371989
452	TAG50.2.FA14.0	1.68071	1.202	2.35007	0.00729815
453	TAG50.2.FA14.1	1.55589	1.1334	2.13587	0.0165573
454	TAG50.2.FA16.0	1.94704	1.41438	2.68032	0.000507731
455	TAG50.2.FA16.1	1.60241	1.19213	2.15391	0.00571174
456	TAG50.2.FA18.0	1.82916	1.34963	2.47908	0.00081338
457	TAG50.2.FA18.1	1.6981	1.22256	2.35861	0.00520507
458	TAG50.2.FA18.2	2.08769	1.50608	2.89392	0.000314823
459	TAG50.2.FA20.2	1.74516	1.38634	2.19684	0.000226457
460	TAG50.3.FA14.0	1.76316	1.22893	2.52962	0.00645248
461	TAG50.3.FA14.1	1.39679	0.958178	2.03618	0.139512
462	TAG50.3.FA16.0	1.85667	1.3179	2.61569	0.0018354
463	TAG50.3.FA16.1	1.66204	1.17843	2.34411	0.0107906
464	TAG50.3.FA18.0	1.89614	1.35595	2.65154	0.00122925
465	TAG50.3.FA18.1	1.69116	1.15636	2.47329	0.0174784
466	TAG50.3.FA18.2	1.89086	1.28818	2.7755	0.00409479
467	TAG50.3.FA18.3	1.92727	1.45127	2.5594	0.00027355
468	TAG50.3.FA20.3	1.59898	1.29561	1.97339	0.00031909
469	TAG50.4.FA14.0	1.61396	1.16596	2.23409	0.0111015
470	TAG50.4.FA14.1	1.42131	0.910023	2.21985	0.191869
471	TAG50.4.FA16.0	1.99095	1.44435	2.74442	0.000390012
472	TAG50.4.FA16.1	1.43376	1.01414	2.027	0.0790549
473	TAG50.4.FA18.1	1.73132	1.20091	2.49601	0.00959608
474	TAG50.4.FA18.2	1.53566	1.08514	2.17321	0.0350877
475	TAG50.4.FA18.3	1.87412	1.35259	2.59675	0.00113212
476	TAG50.4.FA20.3	1.55885	1.22637	1.98146	0.00153348
477	TAG50.4.FA20.4	1.58558	1.28727	1.95301	0.00031909
478	TAG50.5.FA14.0	1.63281	1.22855	2.1701	0.00283964
479	TAG50.5.FA14.1	1.49549	0.95619	2.33895	0.133613
480	TAG50.5.FA16.0	1.89306	1.40596	2.54892	0.000390012
481	TAG50.5.FA16.1	1.62771	1.15576	2.29237	0.0144416
482	TAG50.5.FA18.1	1.8774	1.23418	2.85586	0.00956371
483	TAG50.5.FA18.2	1.58427	1.13903	2.20357	0.0165573
484	TAG50.5.FA18.3	1.631	1.19144	2.23273	0.00696221
485	TAG50.5.FA20.4	1.4838	1.19002	1.8501	0.00200016
486	TAG50.5.FA20.5	1.57091	1.24058	1.98919	0.00120086
487	TAG50.6.FA20.4	1.40534	1.0828	1.82397	0.0254245
488	TAG51.0.FA16.0	1.68935	1.30798	2.18191	0.000621355
489	TAG51.0.FA17.0	1.67904	1.27983	2.20277	0.00122925
490	TAG51.0.FA18.0	1.5471	1.21223	1.97447	0.00200016
491	TAG51.1.FA15.0	1.51007	1.04114	2.1902	0.0600075
492	TAG51.1.FA16.0	1.71048	1.28476	2.27726	0.0013714
493	TAG51.1.FA17.0	1.73761	1.28251	2.3542	0.00179453
494	TAG51.1.FA18.0	1.60379	1.19077	2.16006	0.00596862
495	TAG51.1.FA18.1	1.67182	1.22476	2.28206	0.00424658
496	TAG51.2.FA15.0	1.18888	0.77341	1.82753	0.531251
497	TAG51.2.FA16.0	1.73697	1.19599	2.52267	0.0107138
498	TAG51.2.FA16.1	1.41536	1.0328	1.93961	0.0616579
499	TAG51.2.FA17.0	1.81576	1.25172	2.63397	0.00540646
500	TAG51.2.FA18.0	1.9235	1.1076	3.34043	0.0443157
501	TAG51.2.FA18.1	1.37711	0.93044	2.03821	0.177914
502	TAG51.2.FA18.2	1.83217	1.27891	2.62478	0.00361125
503	TAG51.3.FA15.0	1.12708	0.738758	1.71953	0.66465
504	TAG51.3.FA16.0	0.662165	0.341969	1.28217	0.309171
505	TAG51.3.FA16.1	1.31168	0.904562	1.90204	0.231138
506	TAG51.3.FA17.0	1.73934	1.13914	2.65579	0.0251143
507	TAG51.3.FA18.1	0.535694	0.251078	1.14294	0.174076
508	TAG51.3.FA18.2	1.4216	0.924252	2.18658	0.17768
509	TAG51.3.FA18.3	1.70792	1.24945	2.33461	0.0030433
510	TAG51.4.FA15.0	1.16438	0.781607	1.73462	0.552496
511	TAG51.4.FA16.0	0.974824	0.49677	1.91292	0.956042
512	TAG51.4.FA16.1	1.10464	0.723011	1.6877	0.728826
513	TAG51.4.FA18.1	0.576811	0.274473	1.21218	0.223917
514	TAG51.4.FA18.2	1.06089	0.726668	1.54885	0.828054
515	TAG51.4.FA18.3	1.51681	1.04395	2.20386	0.0583304
516	TAG51.4.FA20.4	1.77651	1.21597	2.59545	0.00880039
517	TAG51.5.FA18.2	1.15338	0.800587	1.66164	0.542028
518	TAG51.5.FA18.3	1.25683	0.880159	1.7947	0.293639
519	TAG52.0.FA16.0	1.83812	1.37399	2.45904	0.000499443
520	TAG52.0.FA18.0	1.7671	1.32765	2.352	0.000796972
521	TAG52.0.FA20.0	2.09898	1.50089	2.93539	0.00031909
522	TAG52.1.FA16.0	1.88959	1.33315	2.67828	0.00175976
523	TAG52.1.FA16.1	1.9919	1.35612	2.92573	0.00196778
524	TAG52.1.FA18.0	1.84986	1.33295	2.56723	0.0013714
525	TAG52.1.FA18.1	1.86146	1.27834	2.71059	0.00423449
526	TAG52.1.FA20.0	1.80398	1.29422	2.51452	0.00210502
527	TAG52.1.FA20.1	1.88349	1.40616	2.52286	0.000372497
528	TAG52.2.FA14.0	1.677	1.20735	2.32933	0.00640119
529	TAG52.2.FA16.0	1.70368	1.10376	2.62967	0.036303
530	TAG52.2.FA16.1	1.52602	1.03873	2.24191	0.0626246
531	TAG52.2.FA18.0	2.03245	1.39106	2.96959	0.00138016
532	TAG52.2.FA18.1	1.61164	1.03073	2.51994	0.0706042
533	TAG52.2.FA18.2	1.93175	1.26462	2.95082	0.00708055
534	TAG52.2.FA20.0	2.23324	1.31561	3.79091	0.00871925
535	TAG52.2.FA20.1	1.84335	1.33312	2.54887	0.00130773
536	TAG52.2.FA20.2	1.97283	1.48023	2.62937	0.000265405
537	TAG52.3.FA14.0	1.99218	1.39686	2.84124	0.00102954
538	TAG52.3.FA16.0	1.60586	1.01159	2.54922	0.0833778
539	TAG52.3.FA16.1	1.06149	0.70588	1.59626	0.83982
540	TAG52.3.FA18.0	1.91528	1.26073	2.90967	0.00708055
541	TAG52.3.FA18.1	1.45264	0.907464	2.32535	0.18848
542	TAG52.3.FA18.2	1.50709	0.950738	2.38899	0.137929
543	TAG52.3.FA18.3	2.04794	1.38297	3.03263	0.00175047
544	TAG52.3.FA20.0	1.64705	1.03614	2.61816	0.0688978
545	TAG52.3.FA20.1	1.95944	1.24605	3.08125	0.0103678
546	TAG52.3.FA20.2	1.99421	1.37912	2.88362	0.00138016
547	TAG52.3.FA20.3	2.02028	1.52343	2.67919	0.000195978
548	TAG52.3.FA22.1	1.78153	1.06846	2.97049	0.0550913
549	TAG52.4.FA14.0	2.12332	1.52047	2.96521	0.000314823
550	TAG52.4.FA16.0	1.40143	0.96337	2.03869	0.133552
551	TAG52.4.FA16.1	0.959985	0.642801	1.43368	0.88721
552	TAG52.4.FA18.0	2.26515	1.43713	3.57025	0.00193119
553	TAG52.4.FA18.1	1.26471	0.815513	1.96134	0.385194
554	TAG52.4.FA18.2	1.23794	0.857123	1.78795	0.34281
555	TAG52.4.FA18.3	1.84063	1.20628	2.80859	0.0128753
556	TAG52.4.FA20.0	1.34125	0.919938	1.9555	0.198171
557	TAG52.4.FA20.2	1.91526	1.23809	2.9628	0.0102095
558	TAG52.4.FA20.3	1.93513	1.38984	2.69435	0.000791635
559	TAG52.4.FA20.4	1.8145	1.38898	2.37037	0.00031909
560	TAG52.4.FA22.1	1.29283	0.833203	2.00602	0.341133
561	TAG52.4.FA22.4	1.94937	1.43674	2.6449	0.000341613
562	TAG52.5.FA14.0	2.03124	1.46181	2.82248	0.000389674
563	TAG52.5.FA16.0	1.63014	1.15278	2.30517	0.0153091
564	TAG52.5.FA16.1	0.995969	0.696005	1.42521	0.985976
565	TAG52.5.FA18.1	1.35652	0.883544	2.08268	0.24415
566	TAG52.5.FA18.2	1.12905	0.799976	1.5935	0.588894
567	TAG52.5.FA18.3	1.52994	1.05549	2.21767	0.0517277
568	TAG52.5.FA20.3	1.99467	1.36787	2.90869	0.00171289
569	TAG52.5.FA20.4	1.67062	1.25465	2.22449	0.00196778
570	TAG52.5.FA20.5	1.66463	1.29061	2.14705	0.000774687
571	TAG52.5.FA22.5	2.07056	1.4676	2.92126	0.000450519
572	TAG52.6.FA14.0	1.90144	1.38451	2.61138	0.000708562
573	TAG52.6.FA16.0	1.77111	1.31156	2.39169	0.00124814
574	TAG52.6.FA16.1	1.27464	0.88501	1.83582	0.274854
575	TAG52.6.FA18.1	1.64712	1.02692	2.64189	0.0744061
576	TAG52.6.FA18.2	1.22146	0.867159	1.72053	0.341133
577	TAG52.6.FA18.3	1.25909	0.899909	1.76164	0.26071
578	TAG52.6.FA20.4	1.80054	1.28223	2.52837	0.00270672
579	TAG52.6.FA20.5	1.5236	1.1756	1.9746	0.00488711
580	TAG52.6.FA22.6	1.56887	1.24414	1.97837	0.00102954
581	TAG52.7.FA16.0	1.69196	1.31479	2.17733	0.000507731
582	TAG52.7.FA18.1	1.96369	1.37615	2.80209	0.00124814
583	TAG52.7.FA20.5	1.37456	1.04866	1.80174	0.0460876
584	TAG52.7.FA22.6	1.3872	1.0853	1.77308	0.0222873
585	TAG52.8.FA16.1	1.64987	1.24808	2.181	0.00196365
586	TAG52.8.FA18.2	2.2229	1.48954	3.31733	0.000791635
587	TAG53.0.FA16.0	1.73488	1.23826	2.43066	0.00470699
588	TAG53.1.FA16.0	1.83703	1.37538	2.45363	0.000471373
589	TAG53.1.FA17.0	1.49576	1.05736	2.11591	0.0490811
590	TAG53.1.FA18.0	1.47457	1.08481	2.00436	0.0304915
591	TAG53.1.FA18.1	1.58472	1.10533	2.27203	0.0288244
592	TAG53.2.FA16.0	1.95836	1.38151	2.77608	0.00113212
593	TAG53.2.FA17.0	1.18808	0.775502	1.82014	0.529779
594	TAG53.2.FA18.0	1.43019	0.785621	2.60362	0.329162
595	TAG53.2.FA18.1	1.25439	0.825442	1.90624	0.378923
596	TAG53.2.FA18.2	1.64159	1.09303	2.46545	0.0378296
597	TAG53.3.FA16.0	2.02927	1.37009	3.00558	0.00187684
598	TAG53.3.FA17.0	1.05262	0.680109	1.62915	0.872188
599	TAG53.3.FA18.0	0.656225	0.433244	0.993969	0.0868445
600	TAG53.3.FA18.1	0.509822	0.23331	1.11405	0.152783
601	TAG53.3.FA18.2	1.16183	0.752517	1.79379	0.595707
602	TAG53.4.FA16.0	2.17322	1.43366	3.29427	0.00141097
603	TAG53.4.FA17.0	1.05278	0.714635	1.55092	0.853291
604	TAG53.4.FA18.0	0.677333	0.445223	1.03045	0.119893
605	TAG53.4.FA18.1	0.558309	0.340431	0.915629	0.0458301
606	TAG53.4.FA18.2	0.903211	0.58415	1.39654	0.729177
607	TAG53.4.FA18.3	1.40869	0.937299	2.11714	0.163969
608	TAG53.4.FA20.4	1.66545	1.2063	2.29938	0.00611568
609	TAG53.5.FA18.1	0.646661	0.422112	0.990662	0.0840911
610	TAG53.5.FA18.2	0.580421	0.357064	0.943496	0.0571493
611	TAG53.5.FA18.3	1.18651	0.742336	1.89647	0.573216
612	TAG53.5.FA20.4	1.62106	1.10729	2.37323	0.0302705
613	TAG53.6.FA18.1	0.648729	0.420939	0.999788	0.091378
614	TAG53.6.FA18.2	0.5471	0.318439	0.939956	0.0583905
615	TAG53.6.FA18.3	0.630859	0.403367	0.986655	0.0821048
616	TAG53.6.FA20.4	1.39283	0.896082	2.16494	0.217881
617	TAG53.7.FA18.3	0.690845	0.434817	1.09763	0.185412
618	TAG54.0.FA16.0	1.98898	1.42586	2.77448	0.000586273
619	TAG54.0.FA18.0	1.62057	1.14567	2.29231	0.0167379
620	TAG54.1.FA16.0	2.02987	1.41547	2.91098	0.000923809
621	TAG54.1.FA18.0	1.52042	1.1138	2.07549	0.0208952
622	TAG54.1.FA18.1	1.59737	1.10101	2.31751	0.0313546
623	TAG54.1.FA20.0	1.76252	1.19318	2.60353	0.0122711
624	TAG54.1.FA20.1	1.857	1.2848	2.68402	0.00364782
625	TAG54.2.FA16.0	1.9421	1.30172	2.89752	0.00409479
626	TAG54.2.FA18.0	1.44572	0.973651	2.14668	0.118108
627	TAG54.2.FA18.1	1.3111	0.884466	1.94352	0.259217
628	TAG54.2.FA18.2	1.77691	1.165	2.71022	0.0193362
629	TAG54.2.FA20.0	2.08683	1.33199	3.26944	0.00459486
630	TAG54.2.FA20.1	1.78198	1.17769	2.69633	0.0165573
631	TAG54.2.FA20.2	2.21859	1.49285	3.29715	0.000753208
632	TAG54.3.FA16.0	1.96552	1.29338	2.98696	0.00513776
633	TAG54.3.FA16.1	1.39658	0.896549	2.1755	0.216336
634	TAG54.3.FA18.0	1.44331	0.935071	2.22779	0.161472
635	TAG54.3.FA18.1	1.04034	0.690797	1.56676	0.893762
636	TAG54.3.FA18.2	1.4109	0.916588	2.1718	0.185588
637	TAG54.3.FA18.3	1.19095	0.710181	1.99719	0.602278
638	TAG54.3.FA20.1	1.74425	1.1206	2.71499	0.0314789
639	TAG54.3.FA20.2	1.92981	1.25278	2.97273	0.00857213
640	TAG54.3.FA20.3	2.35	1.59918	3.45333	0.00031909
641	TAG54.4.FA16.0	2.38989	1.56362	3.65279	0.000615286
642	TAG54.4.FA16.1	1.28231	0.82638	1.98977	0.355702
643	TAG54.4.FA18.0	1.34684	0.928425	1.95381	0.184989
644	TAG54.4.FA18.1	0.93243	0.631964	1.37575	0.79408
645	TAG54.4.FA18.2	1.00339	0.681647	1.47699	0.988732
646	TAG54.4.FA18.3	1.4474	0.958076	2.18664	0.135124
647	TAG54.4.FA20.1	1.42169	0.917791	2.20225	0.184171
648	TAG54.4.FA20.2	1.64846	1.07783	2.52119	0.0460876
649	TAG54.4.FA20.3	2.29151	1.48698	3.53134	0.00119152
650	TAG54.4.FA20.4	2.22147	1.4864	3.32006	0.00081338
651	TAG54.4.FA22.1	0.923146	0.610827	1.39516	0.778237
652	TAG54.4.FA22.4	1.8476	1.39924	2.43963	0.00031909
653	TAG54.5.FA16.0	2.50861	1.61903	3.88699	0.000471373
654	TAG54.5.FA16.1	1.78352	1.13178	2.81056	0.0296769
655	TAG54.5.FA18.0	1.54032	1.06355	2.23084	0.0480843
656	TAG54.5.FA18.1	1.0558	0.74217	1.50197	0.830467
657	TAG54.5.FA18.2	1.0225	0.747943	1.39785	0.916381
658	TAG54.5.FA18.3	1.12833	0.773247	1.64647	0.62299
659	TAG54.5.FA20.2	1.59483	1.03362	2.46075	0.0688978
660	TAG54.5.FA20.3	2.21978	1.39808	3.52443	0.00283167
661	TAG54.5.FA20.4	1.9502	1.27491	2.98317	0.00645248
662	TAG54.5.FA20.5	1.59047	1.18328	2.13779	0.00651599
663	TAG54.5.FA22.1	1.02309	0.717084	1.45968	0.921139
664	TAG54.5.FA22.4	1.67311	1.24308	2.25191	0.00270672
665	TAG54.5.FA22.5	1.96734	1.4337	2.69959	0.000392322
666	TAG54.6.FA16.0	1.99387	1.34005	2.96668	0.00267538
667	TAG54.6.FA16.1	1.86514	1.13744	3.0584	0.0311307
668	TAG54.6.FA18.1	1.13481	0.816963	1.57631	0.549
669	TAG54.6.FA18.2	1.09207	0.831307	1.43463	0.619776
670	TAG54.6.FA18.3	1.04409	0.774351	1.4078	0.841575
671	TAG54.6.FA20.3	1.78276	1.11555	2.84902	0.0353825
672	TAG54.6.FA20.4	1.76223	1.15912	2.67914	0.0202852
673	TAG54.6.FA20.5	1.47782	1.09917	1.98691	0.023721
674	TAG54.6.FA22.5	1.72702	1.22938	2.42609	0.00530417
675	TAG54.6.FA22.6	1.46893	1.15971	1.8606	0.00485002
676	TAG54.7.FA16.1	1.44518	0.93655	2.23005	0.159806
677	TAG54.7.FA18.1	1.2436	0.878604	1.76022	0.305951
678	TAG54.7.FA18.2	1.11148	0.867902	1.42342	0.503551
679	TAG54.7.FA18.3	1.07927	0.841125	1.38483	0.638065
680	TAG54.7.FA20.4	1.41029	0.919069	2.16405	0.184232
681	TAG54.7.FA20.5	1.3675	1.02087	1.83183	0.0701077
682	TAG54.7.FA22.5	1.63641	1.14985	2.32886	0.0165573
683	TAG54.7.FA22.6	1.31862	1.03536	1.67937	0.0519374
684	TAG54.8.FA18.2	1.2249	0.922696	1.62608	0.241912
685	TAG54.8.FA18.3	1.15697	0.91032	1.47046	0.32149
686	TAG54.8.FA20.4	1.37515	0.968871	1.95179	0.129142
687	TAG54.8.FA20.5	1.28538	0.955215	1.72967	0.161472
688	TAG54.8.FA22.6	1.2607	0.987809	1.60898	0.110917
689	TAG55.1.FA16.0	1.21356	0.918665	1.60313	0.254498
690	TAG55.1.FA18.1	1.16753	0.762762	1.78709	0.573576
691	TAG55.2.FA18.1	1.65401	1.12102	2.4404	0.0267111
692	TAG55.2.FA18.2	1.01153	0.709214	1.4427	0.962454
693	TAG55.3.FA18.1	1.31315	0.87748	1.96513	0.268832
694	TAG55.3.FA18.2	1.59698	1.03242	2.47027	0.0696045
695	TAG55.4.FA18.1	1.21798	0.787797	1.88307	0.476653
696	TAG55.4.FA18.2	1.26737	0.856222	1.87596	0.32447
697	TAG55.5.FA18.1	1.21402	0.677461	2.17553	0.607961
698	TAG55.5.FA18.2	1.1629	0.807707	1.67429	0.517212
699	TAG55.5.FA20.4	1.36576	0.855273	2.18094	0.274798
700	TAG55.6.FA18.1	0.644967	0.399154	1.04216	0.127406
701	TAG55.6.FA20.3	0.632499	0.413988	0.966346	0.0678909
702	TAG55.6.FA20.4	0.957124	0.520223	1.76095	0.916381
703	TAG55.7.FA15.0	0.952842	0.643036	1.41191	0.865624
704	TAG55.7.FA18.1	0.818976	0.449744	1.49134	0.607755
705	TAG55.7.FA20.3	0.635	0.408265	0.987654	0.0824673
706	TAG55.7.FA20.4	0.655744	0.424188	1.0137	0.103254
707	TAG55.7.FA22.6	1.12986	0.847076	1.50704	0.506734
708	TAG55.8.FA20.4	0.66127	0.417749	1.04675	0.133552
709	TAG56.1.FA16.0	2.0318	1.46153	2.82458	0.000389674
710	TAG56.1.FA18.1	1.70042	1.07386	2.69258	0.0500181
711	TAG56.10.FA18.2	1.6441	1.05615	2.55937	0.0562365
712	TAG56.2.FA16.0	2.0667	1.45291	2.9398	0.000604731
713	TAG56.2.FA18.0	1.59305	1.06743	2.37749	0.0487979
714	TAG56.2.FA18.1	1.18911	0.686537	2.05958	0.627528
715	TAG56.2.FA20.0	1.32673	0.90425	1.94661	0.22638
716	TAG56.2.FA20.1	1.38002	0.923284	2.06269	0.184837
717	TAG56.3.FA16.0	2.07975	1.38892	3.11419	0.00179453
718	TAG56.3.FA18.0	1.66154	1.06746	2.58624	0.0513205
719	TAG56.3.FA18.1	0.961571	0.631851	1.46335	0.897507
720	TAG56.3.FA18.2	1.4348	0.940676	2.18848	0.156088
721	TAG56.3.FA20.0	1.30669	0.891501	1.91524	0.251924
722	TAG56.3.FA20.1	0.946779	0.638986	1.40283	0.846544
723	TAG56.3.FA20.2	1.32506	0.791541	2.21818	0.375277
724	TAG56.4.FA16.0	2.16174	1.46433	3.1913	0.000835793
725	TAG56.4.FA18.0	2.01415	1.23767	3.27777	0.0133056
726	TAG56.4.FA18.1	1.00561	0.648404	1.5596	0.985976
727	TAG56.4.FA18.2	0.993982	0.672662	1.46879	0.983013
728	TAG56.4.FA20.1	0.925626	0.640928	1.33679	0.756199
729	TAG56.4.FA20.2	0.875096	0.550115	1.39206	0.659109
730	TAG56.4.FA20.3	1.78763	1.08444	2.9468	0.0488653
731	TAG56.4.FA20.4	1.5103	0.912575	2.49952	0.177373
732	TAG56.4.FA22.4	2.08575	1.4342	3.0333	0.000923809
733	TAG56.5.FA16.0	2.05586	1.35634	3.11616	0.00270672
734	TAG56.5.FA18.0	1.44066	0.882808	2.35103	0.221363
735	TAG56.5.FA18.1	1.40027	0.839705	2.33504	0.280203
736	TAG56.5.FA18.2	1.04465	0.710704	1.53552	0.874337
737	TAG56.5.FA20.1	0.962474	0.686688	1.34902	0.874337
738	TAG56.5.FA20.2	0.831363	0.556003	1.24309	0.469429
739	TAG56.5.FA20.3	1.0158	0.609712	1.69237	0.963728
740	TAG56.5.FA20.4	0.996606	0.626955	1.5842	0.989735
741	TAG56.5.FA22.4	1.82261	1.21404	2.73626	0.0107906
742	TAG56.5.FA22.5	1.96079	1.30995	2.935	0.00386411
743	TAG56.6.FA16.0	1.72414	1.12763	2.63621	0.0281294
744	TAG56.6.FA18.0	1.02836	0.680602	1.55381	0.916685
745	TAG56.6.FA18.1	1.32463	0.748327	2.34476	0.434648
746	TAG56.6.FA18.2	1.19778	0.775505	1.85	0.516481
747	TAG56.6.FA18.3	1.1569	0.759108	1.76315	0.595707
748	TAG56.6.FA20.2	0.932649	0.637761	1.36389	0.790365
749	TAG56.6.FA20.3	0.858078	0.538395	1.36758	0.61318
750	TAG56.6.FA20.4	0.842072	0.494561	1.43377	0.619776
751	TAG56.6.FA20.5	1.28447	0.916646	1.7999	0.223398
752	TAG56.6.FA22.4	1.71587	1.1397	2.58331	0.023721
753	TAG56.6.FA22.5	1.52625	1.01359	2.2982	0.081355
754	TAG56.6.FA22.6	1.31608	1.02129	1.69596	0.0673005
755	TAG56.7.FA16.0	1.36423	0.969495	1.91968	0.129142
756	TAG56.7.FA16.1	1.01013	0.670003	1.52294	0.971068
757	TAG56.7.FA18.0	1.32257	0.902762	1.93759	0.230045
758	TAG56.7.FA18.1	1.11146	0.699078	1.7671	0.734746
759	TAG56.7.FA18.2	1.19721	0.763179	1.87809	0.531829
760	TAG56.7.FA18.3	1.31803	0.86713	2.0034	0.279574
761	TAG56.7.FA20.3	0.912333	0.603692	1.37877	0.741822
762	TAG56.7.FA20.4	0.756015	0.478868	1.19356	0.318896
763	TAG56.7.FA20.5	1.02626	0.737824	1.42746	0.912062
764	TAG56.7.FA22.4	1.45203	0.945463	2.23	0.149066
765	TAG56.7.FA22.5	1.32149	0.907918	1.92344	0.223307
766	TAG56.7.FA22.6	1.17791	0.915667	1.51526	0.287212
767	TAG56.8.FA16.0	1.21516	0.921194	1.60293	0.249226
768	TAG56.8.FA16.1	0.965472	0.696511	1.33829	0.880125
769	TAG56.8.FA18.1	1.03654	0.676846	1.58739	0.907603
770	TAG56.8.FA18.2	1.01215	0.714322	1.43415	0.959878
771	TAG56.8.FA18.3	1.32318	0.891831	1.96316	0.24415
772	TAG56.8.FA20.4	0.904464	0.627023	1.30467	0.675935
773	TAG56.8.FA20.5	0.938522	0.694749	1.26783	0.756199
774	TAG56.8.FA22.5	1.1792	0.818771	1.69828	0.476881
775	TAG56.8.FA22.6	1.09783	0.86984	1.38557	0.531829
776	TAG56.9.FA18.3	1.12935	0.815305	1.56437	0.56311
777	TAG56.9.FA20.4	1.09949	0.812942	1.48705	0.628429
778	TAG56.9.FA20.5	1.01877	0.781366	1.32832	0.916381
779	TAG56.9.FA22.6	1.05643	0.837578	1.33248	0.728135
780	TAG57.2.FA18.1	0.893456	0.627435	1.27227	0.623266
781	TAG57.3.FA18.2	0.927617	0.682776	1.26026	0.717342
782	TAG57.8.FA22.6	0.881044	0.579584	1.3393	0.641697
783	TAG57.9.FA22.6	0.664301	0.437379	1.00895	0.0996252
784	TAG58.10.FA18.2	0.902125	0.668349	1.21767	0.596874
785	TAG58.10.FA20.4	1.05053	0.809991	1.36249	0.782683
786	TAG58.10.FA20.5	1.00079	0.788011	1.27103	0.994807
787	TAG58.10.FA22.5	1.04124	0.778634	1.3924	0.846544
788	TAG58.10.FA22.6	0.967807	0.770874	1.21505	0.841575
789	TAG58.2.FA18.1	1.33788	1.02418	1.74767	0.0654083
790	TAG58.3.FA18.1	1.24407	0.901675	1.71649	0.266789
791	TAG58.5.FA18.1	1.44127	0.869071	2.39022	0.23693
792	TAG58.6.FA16.0	1.63476	1.14789	2.32812	0.0168417
793	TAG58.6.FA18.0	1.60733	1.02141	2.52935	0.0773196
794	TAG58.6.FA18.1	1.26908	0.759246	2.12125	0.463846
795	TAG58.6.FA20.4	1.1282	0.680708	1.86987	0.725562
796	TAG58.6.FA22.4	1.26543	0.728162	2.1991	0.504573
797	TAG58.6.FA22.5	1.28193	0.850402	1.93243	0.323979
798	TAG58.7.FA16.0	1.80147	1.23665	2.62427	0.00668348
799	TAG58.7.FA18.0	1.37319	0.953199	1.97823	0.149121
800	TAG58.7.FA18.1	0.842728	0.537799	1.32055	0.552917
801	TAG58.7.FA18.2	1.14134	0.722951	1.80185	0.656806
802	TAG58.7.FA20.4	1.07463	0.666027	1.73392	0.834117
803	TAG58.7.FA22.4	0.918963	0.578834	1.45895	0.790365
804	TAG58.7.FA22.5	0.869118	0.575384	1.3128	0.600032
805	TAG58.7.FA22.6	1.11022	0.854686	1.44216	0.531829
806	TAG58.8.FA18.1	0.843013	0.593068	1.19829	0.441782
807	TAG58.8.FA18.2	0.884928	0.598204	1.30908	0.630452
808	TAG58.8.FA20.3	1.19253	0.821408	1.73132	0.455617
809	TAG58.8.FA20.4	1.17329	0.807436	1.70492	0.503551
810	TAG58.8.FA22.5	0.775629	0.535292	1.12387	0.261059
811	TAG58.8.FA22.6	0.949586	0.737077	1.22336	0.763388
812	TAG58.9.FA18.1	0.910296	0.641778	1.29116	0.683041
813	TAG58.9.FA18.2	0.83512	0.614418	1.1351	0.339063
814	TAG58.9.FA20.4	1.06417	0.787866	1.43738	0.760095
815	TAG58.9.FA22.5	0.917817	0.635515	1.32552	0.729177
816	TAG58.9.FA22.6	0.915957	0.723689	1.15931	0.56335
817	TAG60.10.FA22.5	1.03746	0.727838	1.47878	0.88524
818	TAG60.10.FA22.6	1.08067	0.829311	1.40822	0.652329
819	TAG60.11.FA22.5	0.936232	0.707666	1.23862	0.728826
820	TAG60.11.FA22.6	1.05384	0.830289	1.33758	0.744377
821	TAG60.12.FA22.6	0.984133	0.815582	1.18752	0.907255
