# Supplementary material for: Underlying dyslipidemia postpartum in women with a recent GDM pregnancy who develop type 2 diabetes
Source: eLife. 2020 Aug 4;9:e59153. doi: 10.7554/eLife.59153 (PMC7417169; doi:10.7554/eLife.59153)
Supplement: Figure 3—source data 2. [file elife-59153-fig3-data2.xlsx]

## Sheet: Sheet1
	FPG	2hPG	Fasting Insulin	HOMA-IR	HOMA-B	Age	BMI
HCER(24:1)	-0.28526	-0.138321	-0.427191	-0.440939	-0.283856	0.0262317	-0.0511039		1	1
LCER(16:0)	-0.333374	-0.15902	-0.338193	-0.36509	-0.163336	-0.042486	0.116498		0.8	0.8
PC(17:0/18:1)	-0.2813	-0.206097	-0.38217	-0.399389	-0.245293	0.10509	-0.10167		0.6	0.6
PC(17:0/18:2)	-0.282322	-0.208943	-0.399619	-0.416432	-0.256073	0.0657606	-0.127625		0.4	0.4
PC(18:1/20:4)	-0.340553	-0.187634	-0.428295	-0.451637	-0.252538	0.0186129	-0.0387085		0.2	0.2
PC(18:2/16:1)	-0.317199	-0.190157	-0.432751	-0.451427	-0.268861	0.0503017	-0.122933		0	0
SM(18:1)	-0.226343	-0.117219	-0.330533	-0.341223	-0.207353	-0.0571435	0.0218746		-0.2	-0.2
SM(20:1)	-0.277331	-0.14429	-0.362922	-0.379847	-0.218366	-0.0120923	0.00679772		-0.4	-0.4
SM(24:1)	-0.30852	-0.135678	-0.410876	-0.431198	-0.250298	0.000152129	-0.0310053		-0.6	-0.6
DAG(16:0/16:0)	0.35939	0.113471	0.523805	0.542517	0.359939	-0.0397007	0.143739		-0.8	-0.8
TAG42:0-FA12:0	0.300894	0.0447856	0.35547	0.37704	0.202802	0.0737592	0.0758815		-1	-1
TAG42:0-FA14:0	0.310169	0.0392686	0.381257	0.403263	0.223848	0.0674817	0.0795183
TAG42:0-FA16:0	0.309408	0.0393419	0.412987	0.432665	0.260883	0.0335361	0.0893935
TAG42:1-FA14:0	0.275054	-0.0167662	0.372675	0.391143	0.228544	0.057715	0.0913658
TAG42:1-FA16:0	0.3193	0.0397033	0.438025	0.454847	0.287435	0.0228591	0.0864298
TAG44:0-FA12:0	0.327178	0.0637496	0.423738	0.444558	0.257607	0.0425908	0.103687
TAG44:0-FA14:0	0.34219	0.0706843	0.4629	0.483634	0.291511	0.0461084	0.108363
TAG44:0-FA16:0	0.345789	0.0698253	0.451186	0.473069	0.278955	0.0409858	0.109766
TAG44:1-FA14:0	0.323322	0.0402154	0.404354	0.426747	0.23478	0.0671714	0.0889618
TAG44:1-FA14:1	0.300927	0.049896	0.427155	0.444842	0.272327	0.02715	0.0955141
TAG44:1-FA16:0	0.325702	0.0371652	0.446074	0.465361	0.285067	0.0321275	0.105887
TAG44:1-FA16:1	0.332155	0.0688394	0.434697	0.455663	0.261639	0.0511817	0.114665
TAG44:2-FA16:0	0.326106	0.0127104	0.458037	0.476529	0.30153	0.00306026	0.106786
TAG44:3-FA18:2	0.309638	-0.0267495	0.417967	0.436017	0.268404	-0.000421476	0.093825
TAG45:0-FA16:0	0.333455	0.0496706	0.463456	0.481573	0.298082	0.0249991	0.133926
TAG46:0-FA14:0	0.366597	0.0843839	0.513428	0.53378	0.332865	0.00671234	0.133353
TAG46:0-FA16:0	0.365329	0.0861683	0.514079	0.533778	0.335246	0.00905359	0.136502
TAG46:1-FA14:0	0.341823	0.0639944	0.465164	0.485652	0.289846	0.0424895	0.11456
TAG46:1-FA16:0	0.358802	0.073843	0.470973	0.493054	0.289045	0.041052	0.128812
TAG46:1-FA16:1	0.34536	0.0835359	0.498028	0.51654	0.322199	0.0086317	0.144498
TAG46:2-FA14:0	0.341548	0.0368175	0.437837	0.460732	0.259155	0.0434761	0.106605
TAG46:2-FA14:1	0.290231	0.0322763	0.424297	0.43953	0.270215	0.024808	0.131823
TAG46:2-FA16:0	0.358114	0.0677242	0.458375	0.48209	0.276053	0.042723	0.131076
TAG46:3-FA16:0	0.369238	0.0550496	0.49495	0.516771	0.316013	0.0354211	0.143392
TAG47:0-FA14:0	0.33112	0.0376475	0.46515	0.483536	0.299702	0.0233672	0.130102
TAG47:0-FA15:0	0.348832	0.0692805	0.513078	0.530064	0.340437	-0.000254484	0.162204
TAG47:0-FA16:0	0.350039	0.0690378	0.509118	0.526405	0.337337	0.00439226	0.162528
TAG47:1-FA14:0	0.31879	0.0209136	0.436137	0.4552	0.269211	0.046363	0.136765
TAG47:1-FA15:0	0.312494	0.0446802	0.46158	0.47699	0.298113	0.0476095	0.154471
TAG47:1-FA16:0	0.334604	0.0668081	0.490546	0.506775	0.321655	0.0121392	0.160337
TAG48:0-FA14:0	0.368133	0.0613032	0.500105	0.5222	0.315856	0.0195361	0.124137
TAG48:0-FA16:0	0.383439	0.116289	0.551159	0.570084	0.368429	-0.0223783	0.160102
TAG48:0-FA18:0	0.369382	0.0514829	0.488611	0.512105	0.30333	0.00949863	0.114783
TAG48:1-FA14:0	0.367834	0.0658908	0.498372	0.520554	0.31211	0.0387099	0.132654
TAG48:1-FA16:0	0.372483	0.0894887	0.52411	0.544776	0.33669	0.00716859	0.155153
TAG48:1-FA16:1	0.362502	0.11739	0.538185	0.555193	0.35865	-0.0296264	0.177178
TAG48:1-FA18:1	0.360774	0.0574553	0.485715	0.50768	0.301297	0.0434245	0.126971
TAG48:2-FA14:0	0.371357	0.0670519	0.515013	0.537659	0.325029	0.0121607	0.150959
TAG48:2-FA16:0	0.368987	0.0710855	0.526215	0.547046	0.338263	-0.00150573	0.163503
TAG48:2-FA18:2	0.389018	0.0668541	0.534599	0.558138	0.33953	-0.00177704	0.16165
TAG48:3-FA14:0	0.349747	0.0423572	0.490988	0.512979	0.306972	0.00368069	0.161757
TAG48:3-FA16:0	0.355745	0.0306962	0.514625	0.534698	0.334988	-0.00699978	0.163583
TAG48:3-FA18:3	0.369006	0.0296339	0.49506	0.516914	0.313759	0.0112778	0.126425
TAG48:4-FA14:0	0.328497	0.00737465	0.456714	0.476419	0.287086	0.0152682	0.12536
TAG48:4-FA16:0	0.34064	0.0186929	0.483591	0.502039	0.317229	-0.00581499	0.125812
TAG49:0-FA15:0	0.334177	0.03441	0.483022	0.500119	0.316676	0.0143142	0.16318
TAG49:0-FA16:0	0.363664	0.0703752	0.515029	0.533653	0.336158	-0.0145242	0.159854
TAG49:0-FA17:0	0.365407	0.0776501	0.526316	0.54409	0.348743	-0.0182032	0.150792
TAG49:1-FA16:0	0.34111	0.0579538	0.493978	0.511378	0.320726	0.0137367	0.173956
TAG49:1-FA16:1	0.340665	0.0667497	0.505286	0.522002	0.331319	-0.0198736	0.173823
TAG49:3-FA16:0	0.348065	0.046715	0.514558	0.53275	0.33768	-0.00124522	0.181174
TAG50:0-FA16:0	0.395271	0.112717	0.545392	0.567085	0.354416	-0.024273	0.161714
TAG50:0-FA18:0	0.393542	0.0934769	0.538721	0.56064	0.349618	-0.0263469	0.152523
TAG50:1-FA16:0	0.391801	0.127817	0.555366	0.575402	0.363527	-0.0201206	0.183927
TAG50:1-FA18:0	0.37391	0.0575456	0.509173	0.532015	0.319295	-0.00842923	0.146478
TAG50:1-FA18:1	0.391053	0.108962	0.543882	0.565069	0.351088	-0.0157758	0.174525
TAG50:1-FA20:1	0.332869	0.0506542	0.449235	0.468645	0.280226	0.0379568	0.108261
TAG50:2-FA16:0	0.393262	0.130382	0.564568	0.585577	0.369664	-0.0468114	0.205655
TAG50:2-FA18:0	0.380513	0.0171536	0.50577	0.530122	0.313676	-0.0154726	0.151716
TAG50:2-FA18:2	0.407003	0.143055	0.585837	0.607881	0.389567	-0.0549731	0.208529
TAG50:2-FA20:2	0.336859	0.0772764	0.481057	0.501217	0.30447	0.0158763	0.095078
TAG50:3-FA18:3	0.401365	0.0714856	0.56922	0.590864	0.37952	-0.039242	0.179654
TAG50:3-FA20:3	0.33113	0.0679956	0.467286	0.485173	0.300832	-0.00203867	0.113447
TAG50:4-FA16:0	0.379704	0.0696847	0.550852	0.57191	0.361197	-0.0452709	0.198794
TAG50:4-FA20:4	0.324137	0.0419745	0.453088	0.469884	0.296502	-0.0135657	0.0926965
TAG50:5-FA16:0	0.332837	0.0394725	0.481227	0.498748	0.319747	-0.0317042	0.142081
TAG51:0-FA16:0	0.36334	0.0508076	0.504069	0.522546	0.325926	-0.0125627	0.146767
TAG52:0-FA16:0	0.396154	0.0737857	0.520813	0.54436	0.327138	-0.0310022	0.157058
TAG52:0-FA18:0	0.396687	0.0526859	0.510698	0.534811	0.316218	-0.0340292	0.152849
TAG52:0-FA20:0	0.300417	0.0687901	0.419656	0.43524	0.27139	-0.0181711	0.077361
TAG52:1-FA20:1	0.369127	0.123971	0.526478	0.544334	0.342819	0.00781679	0.151855
TAG52:2-FA20:2	0.352746	0.137349	0.531597	0.546301	0.358539	-0.0310299	0.159833
TAG52:3-FA20:3	0.350753	0.128006	0.538777	0.553166	0.368202	-0.0601796	0.170911
TAG52:4-FA14:0	0.320828	0.0479841	0.454067	0.472457	0.289116	-0.00191795	0.121963
TAG52:4-FA20:3	0.286676	0.0819152	0.461028	0.472489	0.312184	-0.0592443	0.171237
TAG52:4-FA20:4	0.338971	0.105027	0.508093	0.521269	0.354186	-0.0672665	0.151937
TAG52:4-FA22:4	0.347226	0.0539148	0.535179	0.550817	0.365468	-0.0713502	0.165348
TAG52:5-FA14:0	0.32831	0.039973	0.43986	0.460926	0.269957	-0.0134665	0.0892113
TAG52:5-FA20:5	0.277866	0.146347	0.358069	0.373783	0.221105	-0.03569	0.0207962
TAG52:5-FA22:5	0.361146	0.0845063	0.511839	0.53305	0.33283	-0.0282333	0.113263
TAG52:6-FA14:0	0.308809	0.0696613	0.376066	0.39879	0.216386	-0.00748056	-0.0148141
TAG52:7-FA16:0	0.368354	0.0519797	0.50588	0.524985	0.327077	-0.0167797	0.148129
TAG52:8-FA18:2	0.363874	0.0324036	0.517203	0.536719	0.339526	-0.0321383	0.164755
TAG53:1-FA16:0	0.354554	0.0367636	0.470826	0.491611	0.295178	0.00117806	0.0910666
TAG54:0-FA16:0	0.307278	0.0918355	0.358979	0.381024	0.211403	0.0131856	-0.0505486
TAG54:1-FA16:0	0.321449	0.0825055	0.458444	0.474707	0.300733	-0.00531584	0.0942931
TAG54:2-FA20:2	0.337218	0.1315	0.468509	0.485039	0.304354	-0.0441606	0.124367
TAG54:3-FA20:3	0.339608	0.119623	0.481198	0.49846	0.314275	-0.0661529	0.143578
TAG54:4-FA16:0	0.342202	0.123038	0.514913	0.531364	0.343961	-0.0647773	0.18365
TAG54:4-FA20:4	0.330901	0.111813	0.448377	0.46498	0.294465	-0.0862282	0.134602
TAG54:4-FA22:4	0.32895	0.11804	0.5351	0.545592	0.380238	-0.0787235	0.183073
TAG54:5-FA16:0	0.353844	0.116289	0.521381	0.538933	0.348625	-0.0780655	0.191918
TAG54:5-FA22:5	0.342027	0.196392	0.487754	0.505033	0.324934	-0.0474199	0.0987496
TAG56:1-FA16:0	0.305485	0.0837057	0.389703	0.409909	0.239072	-0.0270517	-0.00444962
TAG56:2-FA16:0	0.342075	0.085844	0.437798	0.457322	0.266603	-0.0221174	0.0460052
TAG56:4-FA16:0	0.289042	0.123697	0.408458	0.423866	0.263525	-0.0466746	0.123887
TAG56:4-FA22:4	0.294067	0.113924	0.430392	0.444413	0.28879	-0.0777404	0.143255
