# Supplementary material for: Underlying dyslipidemia postpartum in women with a recent GDM pregnancy who develop type 2 diabetes
Source: eLife. 2020 Aug 4;9:e59153. doi: 10.7554/eLife.59153 (PMC7417169; doi:10.7554/eLife.59153)
Supplement: Figure 4—source data 1. [file elife-59153-fig4-data1.xlsx]

## Sheet: structure_OR
	lipids	carbon	double_bonds	p-value	OR
CE(12:0)	CE	12	0	0.6529	1.05635
CE(14:0)	CE	14	0	0.271911	1.24519
CE(14:1)	CE	14	1	0.0385172	1.39583
CE(15:0)	CE	15	0	0.0502178	0.67092
CE(16:0)	CE	16	0	0.00569444	0.472429
CE(16:1)	CE	16	1	0.954994	1.01191
CE(17:0)	CE	17	0	0.00294046	0.518773
CE(18:0)	CE	18	0	0.00790291	0.514328
CE(18:1)	CE	18	1	0.00847164	0.480642
CE(18:2)	CE	18	2	0.0103486	0.454285
CE(18:3)	CE	18	3	0.881577	1.0328
CE(18:4)	CE	18	4	0.0653077	1.28011
CE(20:0)	CE	20	0	0.864431	0.977146
CE(20:1)	CE	20	1	0.134356	0.778204
CE(20:2)	CE	20	2	0.142388	0.68588
CE(20:3)	CE	20	3	0.152591	0.687601
CE(20:4)	CE	20	4	0.00194421	0.506994
CE(20:5)	CE	20	5	0.35561	0.875943
CE(22:0)	CE	22	0	0.0436025	0.697481
CE(22:1)	CE	22	1	0.249706	0.848036
CE(22:2)	CE	22	2	0.559218	1.05999
CE(22:4)	CE	22	4	0.116396	0.696696
CE(22:5)	CE	22	5	0.0445832	0.603786
CE(22:6)	CE	22	6	0.00279308	0.572452
CE(24:0)	CE	24	0	0.352887	0.844621
CE(24:1)	CE	24	1	0.88858	0.970267
CER(14:0)	CER	14	0	0.0394131	0.626415
CER(16:0)	CER	16	0	0.0064413	0.486049
CER(18:0)	CER	18	0	0.0361332	0.639011
CER(20:0)	CER	20	0	0.0356093	0.605667
CER(22:0)	CER	22	0	0.169552	0.706828
CER(22:1)	CER	22	1	0.00403075	0.506897
CER(24:0)	CER	24	0	0.150259	0.708896
CER(24:1)	CER	24	1	0.0014179	0.467388
CER(26:0)	CER	26	0	0.342771	0.834079
CER(26:1)	CER	26	1	0.00145018	0.512308
DAG(28:0)	DAG	28	0	0.54711	1.10694
DAG(30:1)	DAG	30	1	0.0499741	1.31971
DAG(30:2)	DAG	30	2	0.0270584	1.33926
DAG(28:0)	DAG	28	0	0.1763	1.11959
DAG(30:0)	DAG	30	0	0.00535282	1.34705
DAG(30:1)	DAG	30	1	0.0130152	1.37162
DAG(32:1)	DAG	32	1	0.000882416	1.71567
DAG(32:2)	DAG	32	2	0.000167448	1.76795
DAG(32:3)	DAG	32	3	0.00459623	1.52072
DAG(34:0)	DAG	34	0	0.356479	0.874901
DAG(34:4)	DAG	34	4	0.00411152	1.4387
DAG(30:1)	DAG	30	1	0.3427	0.951982
DAG(32:2)	DAG	32	2	0.368937	0.931261
DAG(33:1)	DAG	33	1	0.161424	1.34757
DAG(33:2)	DAG	33	2	0.398028	1.18388
DAG(32:0)	DAG	32	0	3.51197e-05	1.77062
DAG(32:1)	DAG	32	1	0.000395963	1.55559
DAG(34:0)	DAG	34	0	0.00182969	1.88678
DAG(34:1)	DAG	34	1	0.00114695	1.71043
DAG(34:2)	DAG	34	2	0.00105293	1.77386
DAG(34:3)	DAG	34	3	0.000377211	1.79257
DAG(36:3)	DAG	36	3	0.000210626	1.99829
DAG(36:4)	DAG	36	4	0.0012283	1.67894
DAG(38:5)	DAG	38	5	0.00403135	1.7243
DAG(38:6)	DAG	38	6	0.112193	1.2739
DAG(32:2)	DAG	32	2	0.225715	1.17994
DAG(34:1)	DAG	34	1	0.187561	1.24065
DAG(34:2)	DAG	34	2	0.96754	0.995781
DAG(34:3)	DAG	34	3	0.0646807	1.37808
DAG(34:4)	DAG	34	4	0.716308	1.0456
DAG(36:3)	DAG	36	3	0.432548	1.14509
DAG(36:5)	DAG	36	5	0.0617959	1.32195
DAG(38:7)	DAG	38	7	0.98138	1.00242
DAG(36:1)	DAG	36	1	0.0107792	1.55831
DAG(36:2)	DAG	36	2	0.011886	1.58907
DAG(36:3)	DAG	36	3	0.0236992	1.51654
DAG(40:6)	DAG	40	6	0.513636	0.95892
DAG(36:2)	DAG	36	2	0.435754	1.16405
DAG(36:3)	DAG	36	3	0.602699	1.10561
DAG(38:2)	DAG	38	2	0.587146	1.13328
DAG(38:3)	DAG	38	3	0.823946	1.05993
DAG(38:4)	DAG	38	4	0.47079	1.16613
DAG(38:5)	DAG	38	5	0.531139	1.14004
DAG(38:6)	DAG	38	6	0.188618	1.23544
DAG(40:5)	DAG	40	5	0.708492	0.914137
DAG(40:6)	DAG	40	6	0.823511	1.04391
DAG(40:7)	DAG	40	7	0.79204	1.03509
DAG(36:5)	DAG	36	5	0.285815	1.19117
DAG(38:5)	DAG	38	5	0.827124	1.04825
DAG(38:6)	DAG	38	6	0.486402	1.13605
DAG(38:7)	DAG	38	7	0.656468	1.06888
DAG(40:6)	DAG	40	6	0.414198	1.20751
DAG(40:7)	DAG	40	7	0.9038	0.978316
DAG(40:8)	DAG	40	8	0.917456	1.01242
DCER(16:0)	DCER	16	0	0.0159656	0.622222
DCER(18:0)	DCER	18	0	0.126033	0.90716
DCER(20:0)	DCER	20	0	0.133915	0.782698
DCER(22:0)	DCER	22	0	0.921392	0.976285
DCER(22:1)	DCER	22	1	0.307577	0.803076
DCER(22:2)	DCER	22	2	0.811287	0.948386
DCER(24:0)	DCER	24	0	0.259569	0.762857
DCER(24:1)	DCER	24	1	0.0188557	0.600238
DCER(26:0)	DCER	26	0	0.765295	0.957794
FFA(12:0)	FFA	12	0	0.0486287	0.694337
FFA(14:0)	FFA	14	0	0.026188	0.653432
FFA(14:1)	FFA	14	1	0.0267871	0.762283
FFA(15:0)	FFA	15	0	0.0164646	0.709748
FFA(16:0)	FFA	16	0	0.0803984	0.728544
FFA(16:1)	FFA	16	1	0.00730725	0.6582
FFA(17:0)	FFA	17	0	0.0265294	0.643466
FFA(18:0)	FFA	18	0	0.061173	0.704065
FFA(18:1)	FFA	18	1	0.0192416	0.638034
FFA(18:2)	FFA	18	2	0.0238392	0.644381
FFA(18:4)	FFA	18	4	0.117206	0.754114
FFA(20:0)	FFA	20	0	0.0243197	0.669987
FFA(20:1)	FFA	20	1	0.0360705	0.697045
FFA(20:2)	FFA	20	2	0.0193674	0.658822
FFA(20:3)	FFA	20	3	0.232243	0.808027
FFA(20:4)	FFA	20	4	0.0925549	0.728197
FFA(20:5)	FFA	20	5	0.0556724	0.724493
FFA(22:0)	FFA	22	0	0.0449402	0.709076
FFA(22:1)	FFA	22	1	0.177389	0.819577
FFA(22:2)	FFA	22	2	0.0813103	0.751598
FFA(22:4)	FFA	22	4	0.0631931	0.7044
FFA(22:5)	FFA	22	5	0.205665	0.812341
FFA(22:6)	FFA	22	6	0.163911	0.789528
FFA(24:0)	FFA	24	0	0.253045	0.818598
FFA(24:1)	FFA	24	1	0.164148	0.816749
HCER(14:0)	HCER	14	0	0.00678329	0.611694
HCER(16:0)	HCER	16	0	0.000624629	0.476933
HCER(18:0)	HCER	18	0	0.000188964	0.45747
HCER(18:1)	HCER	18	1	0.00172614	0.571068
HCER(20:0)	HCER	20	0	0.00929374	0.593558
HCER(22:0)	HCER	22	0	0.0413522	0.671983
HCER(22:1)	HCER	22	1	0.0236543	0.655706
HCER(24:0)	HCER	24	0	0.0265821	0.645267
HCER(24:1)	HCER	24	1	0.000130245	0.490049
LCER(14:0)	LCER	14	0	0.0014296	0.594773
LCER(16:0)	LCER	16	0	8.22772e-05	0.472445
LCER(18:0)	LCER	18	0	0.0064818	0.513376
LCER(18:1)	LCER	18	1	0.113968	0.72967
LCER(20:0)	LCER	20	0	0.000902907	0.52005
LCER(20:1)	LCER	20	1	0.0220789	0.678026
LCER(22:0)	LCER	22	0	0.00188639	0.579221
LCER(22:1)	LCER	22	1	0.00163573	0.568562
LCER(24:0)	LCER	24	0	0.00533512	0.612796
LCER(24:1)	LCER	24	1	0.000364064	0.547788
LPC(14:0)	LPC	14	0	0.558315	1.11354
LPC(15:0)	LPC	15	0	0.0248243	0.660338
LPC(16:0)	LPC	16	0	0.0555445	0.656527
LPC(16:1)	LPC	16	1	0.0996864	0.722568
LPC(17:0)	LPC	17	0	0.0007243	0.539207
LPC(18:0)	LPC	18	0	0.111203	0.723644
LPC(18:1)	LPC	18	1	0.00959826	0.609266
LPC(18:2)	LPC	18	2	0.0270323	0.671693
LPC(18:3)	LPC	18	3	0.870858	0.978029
LPC(20:2)	LPC	20	2	0.254203	0.843806
LPC(20:3)	LPC	20	3	0.549667	0.893944
LPC(20:4)	LPC	20	4	0.00505109	0.605372
LPE(16:0)	LPE	16	0	0.233383	0.781307
LPE(16:1)	LPE	16	1	0.102442	1.23013
LPE(18:0)	LPE	18	0	0.108887	0.709593
LPE(18:1)	LPE	18	1	0.867464	0.970363
LPE(18:2)	LPE	18	2	0.850217	1.02636
LPE(20:3)	LPE	20	3	0.894269	1.02478
LPE(20:4)	LPE	20	4	0.162513	0.759979
LPE(22:5)	LPE	22	5	0.828678	0.958669
LPE(22:6)	LPE	22	6	0.0620395	0.713582
MAG(15:0)	MAG	15	0	0.1058	0.897088
MAG(16:0)	MAG	16	0	0.397347	0.928271
MAG(16:1)	MAG	16	1	0.0824789	0.850479
MAG(18:0)	MAG	18	0	0.609464	0.95077
MAG(18:1)	MAG	18	1	0.394527	1.1406
MAG(18:2)	MAG	18	2	0.408273	1.15706
MAG(18:3)	MAG	18	3	0.102849	0.72892
PC(32:1)	PC	32	1	0.744593	0.930567
PC(32:2)	PC	32	2	0.384508	0.822329
PC(34:3)	PC	34	3	0.937937	1.01263
PC(34:4)	PC	34	4	0.1628	0.748801
PC(33:1)	PC	33	1	0.000240072	0.501834
PC(33:2)	PC	33	2	0.011013	0.602167
PC(30:0)	PC	30	0	0.204989	1.25656
PC(32:0)	PC	32	0	0.160587	0.814719
PC(32:1)	PC	32	1	0.172557	1.29612
PC(34:0)	PC	34	0	0.228389	0.847397
PC(34:1)	PC	34	1	0.0477669	0.563832
PC(34:2)	PC	34	2	0.0132271	0.495268
PC(34:3)	PC	34	3	0.115054	1.36581
PC(36:1)	PC	36	1	0.00121035	0.492898
PC(36:2)	PC	36	2	0.207287	0.743199
PC(36:3)	PC	36	3	0.795088	0.939296
PC(36:4)	PC	36	4	0.00259164	0.475093
PC(36:5)	PC	36	5	0.906352	0.98334
PC(38:4)	PC	38	4	0.785709	1.06398
PC(38:5)	PC	38	5	0.0555632	0.598241
PC(38:6)	PC	38	6	0.0142257	0.623203
PC(35:1)	PC	35	1	5.82366e-05	0.418132
PC(35:2)	PC	35	2	2.70838e-05	0.408107
PC(37:4)	PC	37	4	0.00039535	0.539876
PC(34:1)	PC	34	1	0.258585	1.19445
PC(36:0)	PC	36	0	0.434058	0.873163
PC(36:1)	PC	36	1	0.381197	0.813147
PC(36:2)	PC	36	2	0.143182	0.698247
PC(36:3)	PC	36	3	0.0236691	1.44241
PC(38:2)	PC	38	2	0.654118	1.08802
PC(38:3)	PC	38	3	0.394226	1.19169
PC(38:4)	PC	38	4	0.0151039	0.597357
PC(38:5)	PC	38	5	0.894317	1.01821
PC(40:4)	PC	40	4	0.0475074	1.46952
PC(40:5)	PC	40	5	0.736173	1.07414
PC(40:6)	PC	40	6	0.078897	0.714582
PC(34:2)	PC	34	2	0.000237198	0.403529
PC(36:2)	PC	36	2	0.00119659	0.49923
PC(36:3)	PC	36	3	0.00156256	0.503782
PC(36:4)	PC	36	4	0.80054	0.962078
PC(38:3)	PC	38	3	0.0211647	0.661494
PC(38:4)	PC	38	4	0.0841365	0.694248
PC(38:5)	PC	38	5	2.55204e-05	0.408851
PC(38:6)	PC	38	6	0.134245	0.837633
PC(40:6)	PC	40	6	0.00672743	0.612918
PC(40:7)	PC	40	7	0.000233261	0.513626
PC(34:3)	PC	34	3	5.45069e-05	0.390647
PC(36:4)	PC	36	4	0.0892582	0.714263
PC(36:5)	PC	36	5	0.209277	0.806765
PC(38:4)	PC	38	4	0.00550299	0.630977
PC(38:5)	PC	38	5	0.677731	0.915461
PC(38:6)	PC	38	6	0.00337866	0.488576
PC(38:1)	PC	38	1	0.0415707	0.729103
PC(38:2)	PC	38	2	0.0232938	0.682137
PC(40:4)	PC	40	4	0.00354432	0.628669
PE(34:1)	PE	34	1	0.0424997	1.52861
PE(34:2)	PE	34	2	0.0350356	1.53526
PE(36:3)	PE	36	3	0.189546	1.2292
PE(36:4)	PE	36	4	0.874285	1.03668
PE(38:5)	PE	38	5	0.230864	1.26626
PE(38:6)	PE	38	6	0.26351	0.828132
PE(36:0)	PE	36	0	0.0485393	0.6785
PE(36:1)	PE	36	1	0.691697	1.12835
PE(36:2)	PE	36	2	0.214528	1.42198
PE(38:2)	PE	38	2	0.803096	0.947362
PE(38:3)	PE	38	3	0.337258	1.25795
PE(38:4)	PE	38	4	0.30096	0.76929
PE(38:5)	PE	38	5	0.741508	1.04753
PE(40:4)	PE	40	4	0.0232922	1.60687
PE(40:5)	PE	40	5	0.294133	1.31503
PE(40:6)	PE	40	6	0.420429	0.856256
PE(36:2)	PE	36	2	0.327968	1.20783
PE(36:3)	PE	36	3	0.680671	1.08718
PE(38:4)	PE	38	4	0.87194	1.027
PE(38:5)	PE	38	5	0.222235	0.779953
PE(40:7)	PE	40	7	0.0510011	0.746718
PE(34:3)	PE	34	3	0.113188	0.793095
PE(34:2)	PE	34	2	0.317459	0.859171
PE(36:4)	PE	36	4	0.444539	0.889679
PE(38:5)	PE	38	5	0.218302	0.802088
PE(38:6)	PE	38	6	0.0430363	0.722238
PE(36:1)	PE	36	1	0.559045	0.900859
PE(36:2)	PE	36	2	0.171914	0.75732
PE(38:4)	PE	38	4	0.115355	0.754121
PE(40:5)	PE	40	5	0.265826	0.831492
PE(34:1)	PE	34	1	0.238158	0.804886
PE(34:2)	PE	34	2	0.631872	0.924722
PE(36:3)	PE	36	3	0.884964	1.02376
PE(36:4)	PE	36	4	0.2713	0.837532
PE(38:4)	PE	38	4	0.198714	0.80379
PE(38:5)	PE	38	5	0.342507	0.829739
PE(38:6)	PE	38	6	0.0409296	0.706
PE(34:0)	PE	34	0	0.0276052	0.665698
PE(36:1)	PE	36	1	0.185928	0.789228
PE(36:2)	PE	36	2	0.359823	0.863103
PE(38:3)	PE	38	3	0.50045	0.894629
PE(38:4)	PE	38	4	0.0739372	0.753213
PE(38:5)	PE	38	5	0.491928	0.922593
PE(40:4)	PE	40	4	0.109869	0.788955
PE(40:5)	PE	40	5	0.23981	0.806434
PE(40:6)	PE	40	6	0.0347435	0.715319
PE(34:1)	PE	34	1	0.286853	0.850609
PE(36:2)	PE	36	2	0.0494828	0.708828
PE(36:3)	PE	36	3	0.252756	0.821632
PE(38:4)	PE	38	4	0.240149	0.824181
PE(38:5)	PE	38	5	0.0634557	0.737721
PE(40:6)	PE	40	6	0.0659981	0.694272
PE(40:7)	PE	40	7	0.00816598	0.646153
PI(34:1)	PI	34	1	0.188394	1.30301
PI(34:2)	PI	34	2	0.060823	1.47616
PI(36:3)	PI	36	3	0.125501	1.3018
PI(36:4)	PI	36	4	0.188578	1.31361
PI(34:1)	PI	34	1	0.889532	1.0213
PI(36:1)	PI	36	1	0.492138	0.868215
PI(36:2)	PI	36	2	0.239106	0.763673
PI(38:3)	PI	38	3	0.393815	0.823166
PI(38:4)	PI	38	4	0.0194446	0.540171
PI(40:5)	PI	40	5	0.890513	0.975846
PI(36:2)	PI	36	2	0.175797	0.803526
PI(36:3)	PI	36	3	0.192498	0.797968
PI(38:5)	PI	38	5	0.0619332	0.702429
SM(14:0)	SM	14	0	0.0016109	0.473036
SM(16:0)	SM	16	0	0.000495462	0.427267
SM(18:0)	SM	18	0	0.000174302	0.419742
SM(18:1)	SM	18	1	1.1504e-05	0.368336
SM(20:0)	SM	20	0	0.264385	0.82554
SM(20:1)	SM	20	1	2.40969e-05	0.366853
SM(22:0)	SM	22	0	0.0935488	0.678385
SM(22:1)	SM	22	1	0.00360369	0.502487
SM(24:0)	SM	24	0	0.00320561	0.513627
SM(24:1)	SM	24	1	9.42634e-05	0.3935
SM(26:0)	SM	26	0	0.00929618	0.538748
SM(26:1)	SM	26	1	0.000751081	0.468189
TAG(36:0)	TAG	36	0	0.272799	1.09707
TAG(38:0)	TAG	38	0	0.504934	1.05272
TAG(40:0)	TAG	40	0	0.00424848	1.24138
TAG(40:0)	TAG	40	0	0.000318646	1.25253
TAG(42:0)	TAG	42	0	0.000132132	1.25279
TAG(42:0)	TAG	42	0	0.000101962	1.29738
TAG(42:0)	TAG	42	0	8.30606e-05	1.29833
TAG(42:1)	TAG	42	1	7.95923e-05	1.32197
TAG(42:1)	TAG	42	1	2.02878e-05	1.34929
TAG(42:1)	TAG	42	1	0.000612697	1.37035
TAG(42:1)	TAG	42	1	0.00150464	1.28375
TAG(42:2)	TAG	42	2	0.00246765	1.30232
TAG(44:0)	TAG	44	0	6.26392e-05	1.35602
TAG(44:0)	TAG	44	0	2.20665e-06	1.39114
TAG(44:0)	TAG	44	0	1.83164e-05	1.33664
TAG(44:0)	TAG	44	0	0.282008	0.845364
TAG(44:1)	TAG	44	1	0.000399765	1.28404
TAG(44:1)	TAG	44	1	7.3359e-05	1.35299
TAG(44:1)	TAG	44	1	2.99786e-05	1.40515
TAG(44:1)	TAG	44	1	3.67912e-05	1.36539
TAG(44:1)	TAG	44	1	9.11998e-05	1.3722
TAG(44:1)	TAG	44	1	0.000597605	1.36737
TAG(44:2)	TAG	44	2	0.00152963	1.27557
TAG(44:2)	TAG	44	2	0.00105327	1.32964
TAG(44:2)	TAG	44	2	1.71421e-05	1.45035
TAG(44:2)	TAG	44	2	0.000606688	1.33272
TAG(44:2)	TAG	44	2	0.000386975	1.4321
TAG(44:2)	TAG	44	2	0.000298023	1.34889
TAG(44:3)	TAG	44	3	6.44342e-05	1.50137
TAG(45:0)	TAG	45	0	4.07583e-06	1.52531
TAG(45:1)	TAG	45	1	0.000193885	1.47432
TAG(45:1)	TAG	45	1	0.00689398	1.28844
TAG(46:0)	TAG	46	0	0.000374297	1.31637
TAG(46:0)	TAG	46	0	1.23626e-06	1.46806
TAG(46:0)	TAG	46	0	1.43224e-06	1.44424
TAG(46:0)	TAG	46	0	0.000369775	1.35554
TAG(46:1)	TAG	46	1	0.000285082	1.352
TAG(46:1)	TAG	46	1	9.67318e-06	1.48173
TAG(46:1)	TAG	46	1	0.00029317	1.91219
TAG(46:1)	TAG	46	1	2.82863e-05	1.40491
TAG(46:1)	TAG	46	1	9.86559e-06	1.44261
TAG(46:1)	TAG	46	1	0.000377715	1.40561
TAG(46:1)	TAG	46	1	0.000292151	1.41945
TAG(46:2)	TAG	46	2	0.000465722	1.37038
TAG(46:2)	TAG	46	2	2.4293e-05	1.54376
TAG(46:2)	TAG	46	2	8.59163e-05	1.4435
TAG(46:2)	TAG	46	2	7.30622e-05	1.42758
TAG(46:2)	TAG	46	2	0.000377597	1.39445
TAG(46:2)	TAG	46	2	0.000801497	1.41538
TAG(46:2)	TAG	46	2	0.000175118	1.41765
TAG(46:3)	TAG	46	3	0.00133913	1.36041
TAG(46:3)	TAG	46	3	0.000195615	1.4852
TAG(46:3)	TAG	46	3	0.000593836	1.5103
TAG(46:3)	TAG	46	3	9.18824e-05	1.53292
TAG(46:3)	TAG	46	3	0.00102066	1.42853
TAG(46:3)	TAG	46	3	0.000963293	1.51156
TAG(46:3)	TAG	46	3	0.000634444	1.45987
TAG(46:3)	TAG	46	3	0.00035755	1.37327
TAG(46:4)	TAG	46	4	0.000380771	1.53979
TAG(47:0)	TAG	47	0	1.51339e-05	1.48199
TAG(47:0)	TAG	47	0	5.42841e-06	1.59709
TAG(47:0)	TAG	47	0	2.55004e-06	1.57778
TAG(47:0)	TAG	47	0	0.000492793	1.96042
TAG(47:1)	TAG	47	1	0.000120615	1.50237
TAG(47:1)	TAG	47	1	0.000101527	1.51541
TAG(47:1)	TAG	47	1	1.55464e-05	1.5529
TAG(47:1)	TAG	47	1	0.000256071	1.53011
TAG(47:1)	TAG	47	1	0.00137841	1.59845
TAG(47:1)	TAG	47	1	0.000396287	1.49926
TAG(47:2)	TAG	47	2	0.000327052	1.56246
TAG(47:2)	TAG	47	2	0.000373861	1.53551
TAG(47:2)	TAG	47	2	0.00144159	1.45923
TAG(47:2)	TAG	47	2	0.00692477	1.42762
TAG(47:2)	TAG	47	2	0.000198772	1.58243
TAG(48:0)	TAG	48	0	5.99745e-06	1.57693
TAG(48:0)	TAG	48	0	1.09301e-06	1.58016
TAG(48:0)	TAG	48	0	8.12204e-06	1.52067
TAG(48:1)	TAG	48	1	0.00975939	1.26711
TAG(48:1)	TAG	48	1	8.68527e-06	1.64929
TAG(48:1)	TAG	48	1	0.000203285	1.45836
TAG(48:1)	TAG	48	1	5.40227e-06	1.61206
TAG(48:1)	TAG	48	1	1.35003e-05	1.52092
TAG(48:1)	TAG	48	1	0.000240628	1.4416
TAG(48:1)	TAG	48	1	1.2405e-05	1.64736
TAG(48:2)	TAG	48	2	0.00867677	1.31726
TAG(48:2)	TAG	48	2	8.7847e-06	1.77384
TAG(48:2)	TAG	48	2	0.000287645	1.50855
TAG(48:2)	TAG	48	2	1.06354e-05	1.6957
TAG(48:2)	TAG	48	2	0.000212137	1.51563
TAG(48:2)	TAG	48	2	0.00579366	1.32489
TAG(48:2)	TAG	48	2	0.00099082	1.48396
TAG(48:2)	TAG	48	2	5.60991e-06	1.77609
TAG(48:3)	TAG	48	3	0.0130064	1.31093
TAG(48:3)	TAG	48	3	7.9627e-05	1.72218
TAG(48:3)	TAG	48	3	0.000247117	1.63626
TAG(48:3)	TAG	48	3	2.68921e-05	1.66042
TAG(48:3)	TAG	48	3	0.000672686	1.60426
TAG(48:3)	TAG	48	3	0.01056	1.36285
TAG(48:3)	TAG	48	3	0.000511619	1.58785
TAG(48:3)	TAG	48	3	1.11344e-05	1.60626
TAG(48:4)	TAG	48	4	0.0188942	1.2818
TAG(48:4)	TAG	48	4	7.24978e-05	1.67914
TAG(48:4)	TAG	48	4	0.00407603	1.53467
TAG(48:4)	TAG	48	4	3.46576e-05	1.68127
TAG(48:4)	TAG	48	4	0.000984325	1.61058
TAG(48:4)	TAG	48	4	0.0052543	1.45286
TAG(48:4)	TAG	48	4	0.0140629	1.34045
TAG(48:4)	TAG	48	4	0.000617212	1.48237
TAG(48:4)	TAG	48	4	0.000967866	1.35617
TAG(48:5)	TAG	48	5	0.0179707	1.36655
TAG(48:5)	TAG	48	5	0.0114168	1.36295
TAG(49:0)	TAG	49	0	0.000121524	1.63649
TAG(49:0)	TAG	49	0	1.63121e-05	1.60605
TAG(49:0)	TAG	49	0	1.87242e-05	1.62686
TAG(49:0)	TAG	49	0	0.000196512	1.55605
TAG(49:1)	TAG	49	1	0.000232579	1.54661
TAG(49:1)	TAG	49	1	0.000282658	1.66746
TAG(49:1)	TAG	49	1	0.000126138	1.65266
TAG(49:1)	TAG	49	1	0.000118787	1.57952
TAG(49:1)	TAG	49	1	0.000144528	1.56766
TAG(49:1)	TAG	49	1	0.000473241	1.63948
TAG(49:2)	TAG	49	2	0.000906169	1.59181
TAG(49:2)	TAG	49	2	0.000567327	1.78944
TAG(49:2)	TAG	49	2	0.000216627	1.76111
TAG(49:2)	TAG	49	2	0.00725954	1.46996
TAG(49:2)	TAG	49	2	0.000477877	1.62768
TAG(49:2)	TAG	49	2	0.0542809	1.34162
TAG(49:2)	TAG	49	2	0.000458015	1.73272
TAG(49:3)	TAG	49	3	0.00909334	1.57272
TAG(49:3)	TAG	49	3	6.14086e-05	1.95523
TAG(49:3)	TAG	49	3	0.0503422	1.44511
TAG(49:3)	TAG	49	3	0.0107476	1.58984
TAG(49:3)	TAG	49	3	0.000220998	1.70226
TAG(50:0)	TAG	50	0	0.000271024	1.71878
TAG(50:0)	TAG	50	0	6.63897e-06	1.7521
TAG(50:0)	TAG	50	0	5.77813e-06	1.70413
TAG(50:1)	TAG	50	1	0.00034482	1.652
TAG(50:1)	TAG	50	1	1.53875e-05	1.8428
TAG(50:1)	TAG	50	1	0.000192887	1.64625
TAG(50:1)	TAG	50	1	4.2138e-05	1.70369
TAG(50:1)	TAG	50	1	3.01352e-05	1.83655
TAG(50:1)	TAG	50	1	2.12953e-05	1.63959
TAG(50:2)	TAG	50	2	0.00240012	1.68071
TAG(50:2)	TAG	50	2	0.00624589	1.55589
TAG(50:2)	TAG	50	2	4.39085e-05	1.94704
TAG(50:2)	TAG	50	2	0.001781	1.60241
TAG(50:2)	TAG	50	2	9.90719e-05	1.82916
TAG(50:2)	TAG	50	2	0.00158498	1.6981
TAG(50:2)	TAG	50	2	9.97004e-06	2.08769
TAG(50:2)	TAG	50	2	2.1209e-06	1.74516
TAG(50:3)	TAG	50	3	0.00207485	1.76316
TAG(50:3)	TAG	50	3	0.0822461	1.39679
TAG(50:3)	TAG	50	3	0.000402403	1.85667
TAG(50:3)	TAG	50	3	0.00378238	1.66204
TAG(50:3)	TAG	50	3	0.000184163	1.89614
TAG(50:3)	TAG	50	3	0.00674866	1.69116
TAG(50:3)	TAG	50	3	0.0011413	1.89086
TAG(50:3)	TAG	50	3	5.80677e-06	1.92727
TAG(50:3)	TAG	50	3	1.22769e-05	1.59898
TAG(50:4)	TAG	50	4	0.00390784	1.61396
TAG(50:4)	TAG	50	4	0.122226	1.42131
TAG(50:4)	TAG	50	4	2.60935e-05	1.99095
TAG(50:4)	TAG	50	4	0.0414051	1.43376
TAG(50:4)	TAG	50	4	0.00327272	1.73132
TAG(50:4)	TAG	50	4	0.0154711	1.53566
TAG(50:4)	TAG	50	4	0.000159959	1.87412
TAG(50:4)	TAG	50	4	0.00028653	1.55885
TAG(50:4)	TAG	50	4	1.46009e-05	1.58558
TAG(50:5)	TAG	50	5	0.000729799	1.63281
TAG(50:5)	TAG	50	5	0.0777916	1.49549
TAG(50:5)	TAG	50	5	2.61275e-05	1.89306
TAG(50:5)	TAG	50	5	0.00529467	1.62771
TAG(50:5)	TAG	50	5	0.00325003	1.8774
TAG(50:5)	TAG	50	5	0.00627202	1.58427
TAG(50:5)	TAG	50	5	0.0022642	1.631
TAG(50:5)	TAG	50	5	0.000455991	1.4838
TAG(50:5)	TAG	50	5	0.000176985	1.57091
TAG(50:6)	TAG	50	6	0.0105296	1.40534
TAG(51:0)	TAG	51	0	5.90325e-05	1.68935
TAG(51:0)	TAG	51	0	0.000183197	1.67904
TAG(51:0)	TAG	51	0	0.000454054	1.5471
TAG(51:1)	TAG	51	1	0.029821	1.51007
TAG(51:1)	TAG	51	1	0.00023698	1.71048
TAG(51:1)	TAG	51	1	0.00036278	1.73761
TAG(51:1)	TAG	51	1	0.00187564	1.60379
TAG(51:1)	TAG	51	1	0.00120798	1.67182
TAG(51:2)	TAG	51	2	0.430307	1.18888
TAG(51:2)	TAG	51	2	0.0037322	1.73697
TAG(51:2)	TAG	51	2	0.0307163	1.41536
TAG(51:2)	TAG	51	2	0.00167264	1.81576
TAG(51:2)	TAG	51	2	0.0201877	1.9235
TAG(51:2)	TAG	51	2	0.109696	1.37711
TAG(51:2)	TAG	51	2	0.000962818	1.83217
TAG(51:3)	TAG	51	3	0.578837	1.12708
TAG(51:3)	TAG	51	3	0.221428	0.662165
TAG(51:3)	TAG	51	3	0.152447	1.31168
TAG(51:3)	TAG	51	3	0.01037	1.73934
TAG(51:3)	TAG	51	3	0.106439	0.535694
TAG(51:3)	TAG	51	3	0.109291	1.4216
TAG(51:3)	TAG	51	3	0.000789552	1.70792
TAG(51:4)	TAG	51	4	0.454244	1.16438
TAG(51:4)	TAG	51	4	0.940903	0.974824
TAG(51:4)	TAG	51	4	0.64538	1.10464
TAG(51:4)	TAG	51	4	0.14646	0.576811
TAG(51:4)	TAG	51	4	0.759469	1.06089
TAG(51:4)	TAG	51	4	0.0288455	1.51681
TAG(51:4)	TAG	51	4	0.00296919	1.77651
TAG(51:5)	TAG	51	5	0.443658	1.15338
TAG(51:5)	TAG	51	5	0.208516	1.25683
TAG(52:0)	TAG	52	0	4.13668e-05	1.83812
TAG(52:0)	TAG	52	0	9.51319e-05	1.7671
TAG(52:0)	TAG	52	0	1.47164e-05	2.09898
TAG(52:1)	TAG	52	1	0.000349379	1.88959
TAG(52:1)	TAG	52	1	0.000443108	1.9919
TAG(52:1)	TAG	52	1	0.00023435	1.84986
TAG(52:1)	TAG	52	1	0.0011925	1.86146
TAG(52:1)	TAG	52	1	0.000497409	1.80398
TAG(52:1)	TAG	52	1	2.17781e-05	1.88349
TAG(52:2)	TAG	52	2	0.00204277	1.677
TAG(52:2)	TAG	52	2	0.0161396	1.70368
TAG(52:2)	TAG	52	2	0.0312742	1.52602
TAG(52:2)	TAG	52	2	0.000246318	2.03245
TAG(52:2)	TAG	52	2	0.0363771	1.61164
TAG(52:2)	TAG	52	2	0.00231833	1.93175
TAG(52:2)	TAG	52	2	0.00292058	2.23324
TAG(52:2)	TAG	52	2	0.000216489	1.84335
TAG(52:2)	TAG	52	2	3.55597e-06	1.97283
TAG(52:3)	TAG	52	3	0.000141703	1.99218
TAG(52:3)	TAG	52	3	0.0445525	1.60586
TAG(52:3)	TAG	52	3	0.774353	1.06149
TAG(52:3)	TAG	52	3	0.00231994	1.91528
TAG(52:3)	TAG	52	3	0.119838	1.45264
TAG(52:3)	TAG	52	3	0.0809768	1.50709
TAG(52:3)	TAG	52	3	0.000345404	2.04794
TAG(52:3)	TAG	52	3	0.0348513	1.64705
TAG(52:3)	TAG	52	3	0.00358642	1.95944
TAG(52:3)	TAG	52	3	0.00024421	1.99421
TAG(52:3)	TAG	52	3	1.04541e-06	2.02028
TAG(52:3)	TAG	52	3	0.0268411	1.78153
TAG(52:4)	TAG	52	4	9.91186e-06	2.12332
TAG(52:4)	TAG	52	4	0.0775933	1.40143
TAG(52:4)	TAG	52	4	0.841823	0.959985
TAG(52:4)	TAG	52	4	0.000428107	2.26515
TAG(52:4)	TAG	52	4	0.294174	1.26471
TAG(52:4)	TAG	52	4	0.255124	1.23794
TAG(52:4)	TAG	52	4	0.00465769	1.84063
TAG(52:4)	TAG	52	4	0.126965	1.34125
TAG(52:4)	TAG	52	4	0.0035068	1.91526
TAG(52:4)	TAG	52	4	9.25664e-05	1.93513
TAG(52:4)	TAG	52	4	1.24378e-05	1.8145
TAG(52:4)	TAG	52	4	0.251856	1.29283
TAG(52:4)	TAG	52	4	1.80543e-05	1.94937
TAG(52:5)	TAG	52	5	2.421e-05	2.03124
TAG(52:5)	TAG	52	5	0.00570593	1.63014
TAG(52:5)	TAG	52	5	0.982374	0.995969
TAG(52:5)	TAG	52	5	0.163334	1.35652
TAG(52:5)	TAG	52	5	0.489909	1.12905
TAG(52:5)	TAG	52	5	0.0247623	1.52994
TAG(52:5)	TAG	52	5	0.000333815	1.99467
TAG(52:5)	TAG	52	5	0.00044341	1.67062
TAG(52:5)	TAG	52	5	8.68102e-05	1.66463
TAG(52:5)	TAG	52	5	3.40564e-05	2.07056
TAG(52:6)	TAG	52	6	7.19144e-05	1.90144
TAG(52:6)	TAG	52	6	0.000191806	1.77111
TAG(52:6)	TAG	52	6	0.192337	1.27464
TAG(52:6)	TAG	52	6	0.0384376	1.64712
TAG(52:6)	TAG	52	6	0.25241	1.22146
TAG(52:6)	TAG	52	6	0.178782	1.25909
TAG(52:6)	TAG	52	6	0.000685748	1.80054
TAG(52:6)	TAG	52	6	0.0014584	1.5236
TAG(52:6)	TAG	52	6	0.000141168	1.56887
TAG(52:7)	TAG	52	7	4.3741e-05	1.69196
TAG(52:7)	TAG	52	7	0.000199155	1.96369
TAG(52:7)	TAG	52	7	0.0212194	1.37456
TAG(52:7)	TAG	52	7	0.00895835	1.3872
TAG(52:8)	TAG	52	8	0.000437695	1.64987
TAG(52:8)	TAG	52	8	9.20158e-05	2.2229
TAG(53:0)	TAG	53	0	0.00136451	1.73488
TAG(53:1)	TAG	53	1	3.81493e-05	1.83703
TAG(53:1)	TAG	53	1	0.0228965	1.49576
TAG(53:1)	TAG	53	1	0.0131474	1.47457
TAG(53:1)	TAG	53	1	0.012253	1.58472
TAG(53:2)	TAG	53	2	0.000159847	1.95836
TAG(53:2)	TAG	53	2	0.428469	1.18808
TAG(53:2)	TAG	53	2	0.24176	1.43019
TAG(53:2)	TAG	53	2	0.288462	1.25439
TAG(53:2)	TAG	53	2	0.0169104	1.64159
TAG(53:3)	TAG	53	3	0.000413774	2.02927
TAG(53:3)	TAG	53	3	0.818008	1.05262
TAG(53:3)	TAG	53	3	0.0467543	0.656225
TAG(53:3)	TAG	53	3	0.0911861	0.509822
TAG(53:3)	TAG	53	3	0.498479	1.16183
TAG(53:4)	TAG	53	4	0.0002549	2.17322
TAG(53:4)	TAG	53	4	0.794709	1.05278
TAG(53:4)	TAG	53	4	0.0687813	0.677333
TAG(53:4)	TAG	53	4	0.0209333	0.558309
TAG(53:4)	TAG	53	4	0.647075	0.903211
TAG(53:4)	TAG	53	4	0.0992603	1.40869
TAG(53:4)	TAG	53	4	0.00193745	1.66545
TAG(53:5)	TAG	53	5	0.0451695	0.646661
TAG(53:5)	TAG	53	5	0.0281918	0.580421
TAG(53:5)	TAG	53	5	0.474771	1.18651
TAG(53:5)	TAG	53	5	0.0129912	1.62106
TAG(53:6)	TAG	53	6	0.0498876	0.648729
TAG(53:6)	TAG	53	6	0.0289463	0.5471
TAG(53:6)	TAG	53	6	0.0435036	0.630859
TAG(53:6)	TAG	53	6	0.140919	1.39283
TAG(53:7)	TAG	53	7	0.117435	0.690845
TAG(54:0)	TAG	54	0	5.14149e-05	1.98898
TAG(54:0)	TAG	54	0	0.0063608	1.62057
TAG(54:1)	TAG	54	1	0.00011863	2.02987
TAG(54:1)	TAG	54	1	0.00832244	1.52042
TAG(54:1)	TAG	54	1	0.0136341	1.59737
TAG(54:1)	TAG	54	1	0.00440922	1.76252
TAG(54:1)	TAG	54	1	0.000989811	1.857
TAG(54:2)	TAG	54	2	0.00114714	1.9421
TAG(54:2)	TAG	54	2	0.0676136	1.44572
TAG(54:2)	TAG	54	2	0.177442	1.3111
TAG(54:2)	TAG	54	2	0.0076073	1.77691
TAG(54:2)	TAG	54	2	0.00132081	2.08683
TAG(54:2)	TAG	54	2	0.00625771	1.78198
TAG(54:2)	TAG	54	2	8.07337e-05	2.21859
TAG(54:3)	TAG	54	3	0.00155197	1.96552
TAG(54:3)	TAG	54	3	0.139657	1.39658
TAG(54:3)	TAG	54	3	0.0975521	1.44331
TAG(54:3)	TAG	54	3	0.849841	1.04034
TAG(54:3)	TAG	54	3	0.117773	1.4109
TAG(54:3)	TAG	54	3	0.507645	1.19095
TAG(54:3)	TAG	54	3	0.0137265	1.74425
TAG(54:3)	TAG	54	3	0.00286086	1.92981
TAG(54:3)	TAG	54	3	1.35811e-05	2.35
TAG(54:4)	TAG	54	4	5.6957e-05	2.38989
TAG(54:4)	TAG	54	4	0.267318	1.28231
TAG(54:4)	TAG	54	4	0.116717	1.34684
TAG(54:4)	TAG	54	4	0.724441	0.93243
TAG(54:4)	TAG	54	4	0.986324	1.00339
TAG(54:4)	TAG	54	4	0.0790005	1.4474
TAG(54:4)	TAG	54	4	0.115079	1.42169
TAG(54:4)	TAG	54	4	0.0211269	1.64846
TAG(54:4)	TAG	54	4	0.000171253	2.29151
TAG(54:4)	TAG	54	4	9.8892e-05	2.22147
TAG(54:4)	TAG	54	4	0.7043	0.923146
TAG(54:4)	TAG	54	4	1.50015e-05	1.8476
TAG(54:5)	TAG	54	5	3.84677e-05	2.50861
TAG(54:5)	TAG	54	5	0.0126515	1.78352
TAG(54:5)	TAG	54	5	0.0222558	1.54032
TAG(54:5)	TAG	54	5	0.762694	1.0558
TAG(54:5)	TAG	54	5	0.889066	1.0225
TAG(54:5)	TAG	54	5	0.531173	1.12833
TAG(54:5)	TAG	54	5	0.0349105	1.59483
TAG(54:5)	TAG	54	5	0.000723217	2.21978
TAG(54:5)	TAG	54	5	0.00207097	1.9502
TAG(54:5)	TAG	54	5	0.00210321	1.59047
TAG(54:5)	TAG	54	5	0.899821	1.02309
TAG(54:5)	TAG	54	5	0.000685206	1.67311
TAG(54:5)	TAG	54	5	2.77158e-05	1.96734
TAG(54:6)	TAG	54	6	0.000664772	1.99387
TAG(54:6)	TAG	54	6	0.0134988	1.86514
TAG(54:6)	TAG	54	6	0.450702	1.13481
TAG(54:6)	TAG	54	6	0.526923	1.09207
TAG(54:6)	TAG	54	6	0.777203	1.04409
TAG(54:6)	TAG	54	6	0.0156442	1.78276
TAG(54:6)	TAG	54	6	0.00803009	1.76223
TAG(54:6)	TAG	54	6	0.00970799	1.47782
TAG(54:6)	TAG	54	6	0.00162808	1.72702
TAG(54:6)	TAG	54	6	0.00142945	1.46893
TAG(54:7)	TAG	54	7	0.0961563	1.44518
TAG(54:7)	TAG	54	7	0.218749	1.2436
TAG(54:7)	TAG	54	7	0.40235	1.11148
TAG(54:7)	TAG	54	7	0.54869	1.07927
TAG(54:7)	TAG	54	7	0.115565	1.41029
TAG(54:7)	TAG	54	7	0.0358651	1.3675
TAG(54:7)	TAG	54	7	0.00622789	1.63641
TAG(54:7)	TAG	54	7	0.0249881	1.31862
TAG(54:8)	TAG	54	8	0.160506	1.2249
TAG(54:8)	TAG	54	8	0.233301	1.15697
TAG(54:8)	TAG	54	8	0.0745914	1.37515
TAG(54:8)	TAG	54	8	0.0974253	1.28538
TAG(54:8)	TAG	54	8	0.0626864	1.2607
TAG(55:1)	TAG	55	1	0.172972	1.21356
TAG(55:1)	TAG	55	1	0.475768	1.16753
TAG(55:2)	TAG	55	2	0.0112245	1.65401
TAG(55:2)	TAG	55	2	0.949558	1.01153
TAG(55:3)	TAG	55	3	0.185334	1.31315
TAG(55:3)	TAG	55	3	0.0354381	1.59698
TAG(55:4)	TAG	55	4	0.375052	1.21798
TAG(55:4)	TAG	55	4	0.236337	1.26737
TAG(55:5)	TAG	55	5	0.514657	1.21402
TAG(55:5)	TAG	55	5	0.417045	1.1629
TAG(55:5)	TAG	55	5	0.19179	1.36576
TAG(55:6)	TAG	55	6	0.0732468	0.644967
TAG(55:6)	TAG	55	6	0.0341522	0.632499
TAG(55:6)	TAG	55	6	0.887966	0.957124
TAG(55:7)	TAG	55	7	0.809743	0.952842
TAG(55:7)	TAG	55	7	0.513742	0.818976
TAG(55:7)	TAG	55	7	0.0438955	0.635
TAG(55:7)	TAG	55	7	0.057601	0.655744
TAG(55:7)	TAG	55	7	0.406128	1.12986
TAG(55:8)	TAG	55	8	0.0775646	0.66127
TAG(56:1)	TAG	56	1	2.4681e-05	2.0318
TAG(56:1)	TAG	56	1	0.023585	1.70042
TAG(56:10)	TAG	56	10	0.027673	1.6441
TAG(56:2)	TAG	56	2	5.39679e-05	2.0667
TAG(56:2)	TAG	56	2	0.0226456	1.59305
TAG(56:2)	TAG	56	2	0.53657	1.18911
TAG(56:2)	TAG	56	2	0.148347	1.32673
TAG(56:2)	TAG	56	2	0.116247	1.38002
TAG(56:3)	TAG	56	3	0.000378142	2.07975
TAG(56:3)	TAG	56	3	0.0245038	1.66154
TAG(56:3)	TAG	56	3	0.854873	0.961571
TAG(56:3)	TAG	56	3	0.0937287	1.4348
TAG(56:3)	TAG	56	3	0.170302	1.30669
TAG(56:3)	TAG	56	3	0.785144	0.946779
TAG(56:3)	TAG	56	3	0.284314	1.32506
TAG(56:4)	TAG	56	4	0.000104856	2.16174
TAG(56:4)	TAG	56	4	0.00482955	2.01415
TAG(56:4)	TAG	56	4	0.980065	1.00561
TAG(56:4)	TAG	56	4	0.975829	0.993982
TAG(56:4)	TAG	56	4	0.680252	0.925626
TAG(56:4)	TAG	56	4	0.573208	0.875096
TAG(56:4)	TAG	56	4	0.0227364	1.78763
TAG(56:4)	TAG	56	4	0.108703	1.5103
TAG(56:4)	TAG	56	4	0.00011952	2.08575
TAG(56:5)	TAG	56	5	0.000683037	2.05586
TAG(56:5)	TAG	56	5	0.14398	1.44066
TAG(56:5)	TAG	56	5	0.196927	1.40027
TAG(56:5)	TAG	56	5	0.824093	1.04465
TAG(56:5)	TAG	56	5	0.824284	0.962474
TAG(56:5)	TAG	56	5	0.368224	0.831363
TAG(56:5)	TAG	56	5	0.95199	1.0158
TAG(56:5)	TAG	56	5	0.98853	0.996606
TAG(56:5)	TAG	56	5	0.00378526	1.82261
TAG(56:5)	TAG	56	5	0.0010684	1.96079
TAG(56:6)	TAG	56	6	0.0119233	1.72414
TAG(56:6)	TAG	56	6	0.894354	1.02836
TAG(56:6)	TAG	56	6	0.334589	1.32463
TAG(56:6)	TAG	56	6	0.415827	1.19778
TAG(56:6)	TAG	56	6	0.497808	1.1569
TAG(56:6)	TAG	56	6	0.719166	0.932649
TAG(56:6)	TAG	56	6	0.519821	0.858078
TAG(56:6)	TAG	56	6	0.526712	0.842072
TAG(56:6)	TAG	56	6	0.145848	1.28447
TAG(56:6)	TAG	56	6	0.00969923	1.71587
TAG(56:6)	TAG	56	6	0.0429071	1.52625
TAG(56:6)	TAG	56	6	0.0337732	1.31608
TAG(56:7)	TAG	56	7	0.0747167	1.36423
TAG(56:7)	TAG	56	7	0.961605	1.01013
TAG(56:7)	TAG	56	7	0.151309	1.32257
TAG(56:7)	TAG	56	7	0.655096	1.11146
TAG(56:7)	TAG	56	7	0.433324	1.19721
TAG(56:7)	TAG	56	7	0.196145	1.31803
TAG(56:7)	TAG	56	7	0.663212	0.912333
TAG(56:7)	TAG	56	7	0.229947	0.756015
TAG(56:7)	TAG	56	7	0.877623	1.02626
TAG(56:7)	TAG	56	7	0.088423	1.45203
TAG(56:7)	TAG	56	7	0.145516	1.32149
TAG(56:7)	TAG	56	7	0.202553	1.17791
TAG(56:8)	TAG	56	8	0.167871	1.21516
TAG(56:8)	TAG	56	8	0.832957	0.965472
TAG(56:8)	TAG	56	8	0.868911	1.03654
TAG(56:8)	TAG	56	8	0.945848	1.01215
TAG(56:8)	TAG	56	8	0.164154	1.32318
TAG(56:8)	TAG	56	8	0.591134	0.904464
TAG(56:8)	TAG	56	8	0.679252	0.938522
TAG(56:8)	TAG	56	8	0.375812	1.1792
TAG(56:8)	TAG	56	8	0.431959	1.09783
TAG(56:9)	TAG	56	9	0.464343	1.12935
TAG(56:9)	TAG	56	9	0.538106	1.09949
TAG(56:9)	TAG	56	9	0.890709	1.01877
TAG(56:9)	TAG	56	9	0.642994	1.05643
TAG(57:2)	TAG	57	2	0.532168	0.893456
TAG(57:3)	TAG	57	3	0.630842	0.927617
TAG(57:8)	TAG	57	8	0.553375	0.881044
TAG(57:9)	TAG	57	9	0.0550912	0.664301
TAG(58:10)	TAG	58	10	0.500909	0.902125
TAG(58:10)	TAG	58	10	0.71023	1.05053
TAG(58:10)	TAG	58	10	0.994807	1.00079
TAG(58:10)	TAG	58	10	0.78523	1.04124
TAG(58:10)	TAG	58	10	0.778021	0.967807
TAG(58:2)	TAG	58	2	0.032744	1.33788
TAG(58:3)	TAG	58	3	0.1836	1.24407
TAG(58:5)	TAG	58	5	0.156703	1.44127
TAG(58:6)	TAG	58	6	0.00643886	1.63476
TAG(58:6)	TAG	58	6	0.0402137	1.60733
TAG(58:6)	TAG	58	6	0.36328	1.26908
TAG(58:6)	TAG	58	6	0.639838	1.1282
TAG(58:6)	TAG	58	6	0.403781	1.26543
TAG(58:6)	TAG	58	6	0.235585	1.28193
TAG(58:7)	TAG	58	7	0.00216541	1.80147
TAG(58:7)	TAG	58	7	0.0886372	1.37319
TAG(58:7)	TAG	58	7	0.455264	0.842728
TAG(58:7)	TAG	58	7	0.570405	1.14134
TAG(58:7)	TAG	58	7	0.768078	1.07463
TAG(58:7)	TAG	58	7	0.720089	0.918963
TAG(58:7)	TAG	58	7	0.505021	0.869118
TAG(58:7)	TAG	58	7	0.433366	1.11022
TAG(58:8)	TAG	58	8	0.341215	0.843013
TAG(58:8)	TAG	58	8	0.540607	0.884928
TAG(58:8)	TAG	58	8	0.354616	1.19253
TAG(58:8)	TAG	58	8	0.401934	1.17329
TAG(58:8)	TAG	58	8	0.179339	0.775629
TAG(58:8)	TAG	58	8	0.689001	0.949586
TAG(58:9)	TAG	58	9	0.598181	0.910296
TAG(58:9)	TAG	58	9	0.249858	0.83512
TAG(58:9)	TAG	58	9	0.685104	1.06417
TAG(58:9)	TAG	58	9	0.647467	0.917817
TAG(58:9)	TAG	58	9	0.465227	0.915957
TAG(60:10)	TAG	60	10	0.838875	1.03746
TAG(60:10)	TAG	60	10	0.565722	1.08067
TAG(60:11)	TAG	60	11	0.644498	0.936232
TAG(60:11)	TAG	60	11	0.666403	1.05384
TAG(60:12)	TAG	60	12	0.867473	0.984133
