# Supplementary material for: Underlying dyslipidemia postpartum in women with a recent GDM pregnancy who develop type 2 diabetes
Source: eLife. 2020 Aug 4;9:e59153. doi: 10.7554/eLife.59153 (PMC7417169; doi:10.7554/eLife.59153)
Supplement: Figure 4—source data 2. [file elife-59153-fig4-data2.xlsx]

## Sheet: FA_structure
			SAT								ODD		MUFA							PUFA
	Lipid Group	Lipid Class	FA12:0	FA14:0	FA16:0	FA18:0	FA20:0	FA22:0	FA24:0	FA26:0	FA15:0	FA17:0	FA14:1	FA16:1	FA18:1	FA20:1	FA22:1	FA24:1	FA26:1	FA18:2	FA20:2	FA22:2	FA18:3	FA20:3	FA18:4	FA20:4	FA22:4	FA20:5	FA22:5	FA22:6
		Total	1.44942	2.90032	19.5087	0.931168	0.774312	0.690947	0.524023	0.699484	0.89775	0.76629	1.26188	1.76602	2.22419	0.57888	0.507583	0.385034	0.492265	0.256442	1.79359	0.932787	2.34084	1.36614	1.31797	0.492183	1.73773	1.06922	1.22825	0.733444
	Neutral Lipids	MAG			0.937587	0.970551					0.908877			0.867677	1.20334					1.26439			0.784145
		DAG	1.57817	1.58075	1.48399	1.50879	0.942471				1.41798		0.912177	1.07928	1.21988	1.23867				1.4214	1.30926		1.45779	1.54472		1.46807	1.1978	1.33703	1.28087	1.0117
		TAG	1.32198	1.70222	1.92021	1.98585	1.92299				1.5955	1.64338	1.64481	1.55012	1.6284	1.65857	1.17141			1.49271	1.79456		1.62388	2.42021		1.95279	1.88036	1.43581	1.60152	1.20395
		FFA	0.730819	0.685697	0.790999	0.762005	0.702506	0.742875	0.853886		0.737002	0.678033	0.780558	0.660604	0.67989	0.732013	0.856945	0.850896		0.683483	0.690893	0.777409		0.861841	0.807692	0.78973	0.757409	0.770903	0.861818	0.845732
		CE	1.07205	1.30914	0.535177	0.567522	1.01076	0.721588	0.92394		0.712496	0.561354	1.40325	1.0685	0.531118	0.821359	0.878821	1.07854		0.512662	0.758151	1.08449	1.14078	0.780183	1.32548	0.589276	0.800184	0.930862	0.690478	0.640132
	Phospholipids	PC		1.0908	0.414792	0.712228	0.667304				0.595945	0.399322		0.636401	0.426455	0.568434				0.49077	0.832594		1.49626	1.10917		0.554685	1.27243	1.04312	0.777327	0.682397
		LPC		1.17632	0.683712	0.762633					0.667135	0.531078		0.74561	0.615622					0.679631	0.873644		1.01765	0.946149		0.658445
		PE			0.952377	0.831681								0.995475	0.74271					1.20454	0.845089			1.15325		0.772816	0.947431	1.08763	0.965719	0.722653
		LPE			0.831552	0.744248								1.23547	1.0301					1.02525				1.07766		0.805716			1.07401	0.769984
		PI			1.71628	0.626899								1.18129	0.898388					1.01455				0.949564		0.61927			1.13102
	Sphingolipids	DCER			0.655649	0.917783	0.839582	1.14507	0.842169	1.03572							1.03851	0.626422
		CER		0.643162	0.482194	0.690539	0.640615	0.77714	0.762218	0.892337							0.516097	0.465056	0.507176
		HCER		0.628994	0.474101	0.445498	0.613627	0.709111	0.664437						0.582405		0.677004	0.481007
		LCER		0.602129	0.461774	0.549276	0.530188	0.590564	0.622811						0.787541	0.696238	0.594194	0.545174
		SM		0.456478	0.40108	0.420577	0.861946	0.709231	0.514379	0.557147					0.373754	0.359671	0.493173	0.367486	0.472328
	Numbers in the table indicate odds ratios, red color denotes p<0.05, black color denotes no significance
