# Supplementary material for: Underlying dyslipidemia postpartum in women with a recent GDM pregnancy who develop type 2 diabetes
Source: eLife. 2020 Aug 4;9:e59153. doi: 10.7554/eLife.59153 (PMC7417169; doi:10.7554/eLife.59153)
Supplement: Figure 6—source data 1. [file elife-59153-fig6-data1.xlsx]

## Sheet: Sheet1
	Area Under the Curve
	Test Result Variable(s)	Area	Std. Error	p-value	95% Confidence Interval
					Lower Bound	Upper Bound
	Lipids	0.739	0.026	1.13e-14	0.688	0.79
	FPG	0.703	0.028	5.09e-11	0.649	0.757
	FPG+lipids	0.795	0.023	1.62e-21	0.749	0.84
	2hPG	0.704	0.028	3.77e-11	0.65	0.758
	2hPG+lipids	0.809	0.023	1.74e-23	0.764	0.853
	FPG+2hPG	0.775	0.025	6.55e-19	0.726	0.823
	FPG+2hPG+lipids	0.842	0.021	1.65e-28	0.802	0.883
